# Supplementary material for: Forensic autopsies in Norway 1996–2017: A retrospective study of factors associated with deaths undergoing forensic autopsy
Source: PubMed Central journal article supplement (PMC9152604; doi:10.1177/1403494821997208), 2021-03-08
Supplement: sj-pdf-1-sjp-10.1177_1403494821997208.pdf [file sj-pdf-1-sjp-10.1177_1403494821997208.pdf]

## Forensic autopsies in Norway 1996-2017 – a retrospective study of factors correlated with the autopsy frequency

### Supplementary tables

#### Notifiable deaths in Norway

| <b>Deaths in Norway where the police is to be notified</b>                                  |
|---------------------------------------------------------------------------------------------|
| (regulation FOR-2000-12-21-1378)                                                            |
| Homicide or other forms for assault*                                                        |
| Suicide or self-inflicted injury                                                            |
| Accidents (e.g. fire, avalanche, lightning, drowning, fall, transport accident)             |
| Occupational accident or injury                                                             |
| Medical misadventure, accident or neglect                                                   |
| Drug abuse                                                                                  |
| Sudden and unexpected death of unknown cause                                                |
| Deaths in custody                                                                           |
| Unidentified body*                                                                          |
| Children below 18 years with unknown cause of death, dying outside health care institution* |
| (regulation FOR-1985-06-28-1679, §13-2)                                                     |
| (*Autopsy mandatory)                                                                        |

#### Definitions

| <b>Underlying cause of death</b>                     | <b>ICD-10 codes</b>                                                      |
|------------------------------------------------------|--------------------------------------------------------------------------|
| 1. Natural                                           | A00-Q99 (except F11-F12, F14-F16, F19), R95                              |
| 2. Ill-defined                                       | R00-R99 (except R95)                                                     |
| 3. Traffic accidents                                 | V00-V89, Y85.0                                                           |
| 4. Accidental falls                                  | W00-W19, X59 in combination with S72                                     |
| 5. Accidental poisonings                             | X40-X49, F11-F12, F14-F16, F19                                           |
| 6. Other accidents and events of undetermined intent | V90 – V99, W20 – X39.9, X50 – X59, Y10 – Y84, Y85.9 – Y86, Y87.2 – Y89.9 |
| 7. Intentional self-harm (suicide)                   | X60 – X84, Y87.0                                                         |
| 8. Assault (homicide)                                | X85 – Y09, Y87.1                                                         |
| <b>Place of death</b>                                |                                                                          |
| 1. At home                                           | At home                                                                  |
| 2. Hospital                                          | Somatic and psychiatric hospitals                                        |
| 3. Nursing home                                      | Nursing homes, other health care institutions                            |
| 4. Other known                                       | Other known, during transport                                            |
| 5. Unknown                                           | Unknown, abroad                                                          |

## Overview of results

**All causes of death**

|                       |              | All deaths    | Forensic autopsies | Per cent   |                       |           |            |                    |          |
|-----------------------|--------------|---------------|--------------------|------------|-----------------------|-----------|------------|--------------------|----------|
| <b>Total</b>          |              | <b>920232</b> | <b>37398</b>       | <b>4.1</b> |                       |           |            |                    |          |
| Variable              | Level        | All deaths    | Forensic autopsies | Per cent   | Autopsies per 100,000 | Level     | All deaths | Forensic autopsies | Per cent |
| <b>Year</b>           | 1996         | 43636         | 1813               | 4.2        | 41.4                  | 1996-2002 | 308193     | 12833              | 4.2      |
|                       | 1997         | 44373         | 1940               | 4.4        | 44.0                  | 2003-2010 | 329364     | 12784              | 3.9      |
|                       | 1998         | 43966         | 1972               | 4.5        | 44.5                  | 2011-2017 | 282675     | 11781              | 4.2      |
|                       | 1999         | 44834         | 1775               | 4.0        | 39.8                  |           |            |                    |          |
|                       | 2000         | 43682         | 1884               | 4.3        | 42.0                  |           |            |                    |          |
|                       | 2001         | 43666         | 1715               | 3.9        | 38.0                  |           |            |                    |          |
|                       | 2002         | 44036         | 1734               | 3.9        | 38.2                  |           |            |                    |          |
|                       | 2003         | 42177         | 1626               | 3.9        | 35.6                  |           |            |                    |          |
|                       | 2004         | 40816         | 1600               | 3.9        | 34.9                  |           |            |                    |          |
|                       | 2005         | 40759         | 1599               | 3.9        | 34.6                  |           |            |                    |          |
|                       | 2006         | 40872         | 1552               | 3.8        | 33.3                  |           |            |                    |          |
|                       | 2007         | 41556         | 1584               | 3.8        | 33.6                  |           |            |                    |          |
|                       | 2008         | 41300         | 1607               | 3.9        | 33.7                  |           |            |                    |          |
|                       | 2009         | 40950         | 1621               | 4.0        | 33.6                  |           |            |                    |          |
|                       | 2010         | 40934         | 1595               | 3.9        | 32.6                  |           |            |                    |          |
|                       | 2011         | 40759         | 1659               | 4.1        | 33.5                  |           |            |                    |          |
|                       | 2012         | 41349         | 1531               | 3.7        | 30.5                  |           |            |                    |          |
|                       | 2013         | 40475         | 1630               | 4.0        | 32.1                  |           |            |                    |          |
|                       | 2014         | 39728         | 1652               | 4.2        | 32.2                  |           |            |                    |          |
| 2015                  | 40075        | 1812          | 4.5                | 34.9       |                       |           |            |                    |          |
| 2016                  | 40128        | 1733          | 4.3                | 33.1       |                       |           |            |                    |          |
| 2017                  | 40161        | 1764          | 4.4                | 33.4       |                       |           |            |                    |          |
| <b>Sex</b>            | Male         | 446396        | 26648              | 6.0        |                       |           |            |                    |          |
|                       | Female       | 473836        | 10750              | 2.3        |                       |           |            |                    |          |
| <b>Age group</b>      | 0-9          | 5634          | 1045               | 18.6       |                       |           |            |                    |          |
|                       | 10-19        | 3009          | 1429               | 47.5       |                       |           |            |                    |          |
|                       | 20-29        | 7536          | 4484               | 59.5       |                       |           |            |                    |          |
|                       | 30-39        | 10865         | 5170               | 47.6       |                       |           |            |                    |          |
|                       | 40-49        | 22138         | 6196               | 28.0       |                       |           |            |                    |          |
|                       | 50-59        | 51013         | 7082               | 13.9       |                       |           |            |                    |          |
|                       | 60-69        | 100033        | 5918               | 5.9        |                       |           |            |                    |          |
|                       | 70-79        | 202944        | 3791               | 1.9        |                       |           |            |                    |          |
|                       | 80-89        | 344250        | 1997               | 0.6        |                       |           |            |                    |          |
| 90+                   | 172810       | 286           | 0.2                |            |                       |           |            |                    |          |
| <b>Place of death</b> | At_home      | 139839        | 18006              | 12.9       |                       |           |            |                    |          |
|                       | Hospital     | 343972        | 4530               | 1.3        |                       |           |            |                    |          |
|                       | Nursing_home | 393353        | 437                | 0.1        |                       |           |            |                    |          |
|                       | Other_known  | 29003         | 10508              | 36.2       |                       |           |            |                    |          |

|                                |                           |        |       |      |                          |
|--------------------------------|---------------------------|--------|-------|------|--------------------------|
|                                | Unknown                   | 14065  | 3917  | 27.9 |                          |
| <b>Cause of death</b>          | 1.Natural                 | 830154 | 14339 | 1.7  |                          |
|                                | 2.Ill-defined             | 30074  | 889   | 3.0  |                          |
|                                | 3.Traffic_acc             | 5631   | 2946  | 52.3 |                          |
|                                | 4.Acc_falls               | 20306  | 1050  | 5.2  |                          |
|                                | 5.Acc_poisonings          | 7719   | 6090  | 78.9 |                          |
|                                | 6.Other_ext               | 9094   | 3601  | 39.6 |                          |
|                                | 7.Suicide                 | 11984  | 7639  | 63.7 |                          |
|                                | 8.Homicide                | 874    | 844   | 96.6 |                          |
|                                | Missing                   | 4396   | 0     | 0.0  |                          |
| <b>Police district</b>         | Agder                     | 52658  | 906   | 1.7  |                          |
|                                | Asker og Bærum            | 22681  | 1041  | 4.6  |                          |
|                                | Follo                     | 17782  | 751   | 4.2  |                          |
|                                | Gudbrandsdal              | 17935  | 160   | 0.9  |                          |
|                                | Haugaland og Sunnhordland | 24705  | 1334  | 5.4  |                          |
|                                | Hedmark                   | 48116  | 754   | 1.6  |                          |
|                                | Helgeland                 | 15874  | 481   | 3.0  |                          |
|                                | Hordaland                 | 77839  | 6096  | 7.8  |                          |
|                                | Midtre Hålogaland         | 26694  | 570   | 2.1  |                          |
|                                | Nord-Trøndelag            | 27846  | 572   | 2.1  |                          |
|                                | Nordmøre og Romsdal       | 23753  | 433   | 1.8  |                          |
|                                | Nordre Buskerud           | 18894  | 593   | 3.1  |                          |
|                                | Oslo                      | 108425 | 7955  | 7.3  |                          |
|                                | Rogaland                  | 45987  | 2736  | 5.9  |                          |
|                                | Romerike                  | 41148  | 959   | 2.3  |                          |
|                                | Salten                    | 15861  | 684   | 4.3  |                          |
|                                | Sogn og Fjordane          | 22019  | 595   | 2.7  |                          |
|                                | Sunnmøre                  | 24738  | 253   | 1.0  |                          |
|                                | Søndre Buskerud           | 37658  | 1637  | 4.3  |                          |
|                                | Sør-Trøndelag             | 54320  | 2277  | 4.2  |                          |
|                                | Telemark                  | 38780  | 1673  | 4.3  |                          |
|                                | Troms                     | 22870  | 842   | 3.7  |                          |
|                                | Vestfinnmark              | 7323   | 195   | 2.7  |                          |
|                                | Vestfold                  | 43670  | 1257  | 2.9  |                          |
|                                | Vestoppland               | 25988  | 412   | 1.6  |                          |
|                                | Østfinnmark               | 6234   | 242   | 3.9  |                          |
| Østfold                        | 50434                     | 1990   | 3.9   |      |                          |
| <b>Municipality population</b> | <2000                     | 24640  | 860   | 3.5  |                          |
|                                | 2000-4999                 | 81893  | 2943  | 3.6  |                          |
|                                | 5000-9999                 | 107207 | 3288  | 3.1  |                          |
|                                | 10000-19999               | 137192 | 4308  | 3.1  |                          |
|                                | 20000-49999               | 221488 | 6049  | 2.7  | (0-49999 collated 3.0 %) |
|                                | 50000+                    | 347812 | 19950 | 5.7  |                          |
| <b>Urbanity index</b>          | 0B (Most rural)           | 95353  | 2903  | 3    |                          |
|                                | 0A                        | 23694  | 865   | 3.7  |                          |
|                                | 1B                        | 38087  | 1030  | 2.7  |                          |

Forensic autopsies in Norway 1996-2017 – Supplementary tables

|                      |                 |        |       |     |                         |
|----------------------|-----------------|--------|-------|-----|-------------------------|
|                      | 1A              | 36127  | 1057  | 2.9 |                         |
|                      | 2B              | 72187  | 1739  | 2.4 |                         |
|                      | 2A              | 192061 | 5400  | 2.8 | (0B-2A collated 2.8%)   |
|                      | 3A (Most urban) | 462723 | 24404 | 5.3 |                         |
| <b>Distance</b>      | 0-49            | 383673 | 21944 | 5.7 |                         |
| <b>to autopsy</b>    | 50-99           | 143128 | 5053  | 3.5 |                         |
| <b>facility (km)</b> | 100-149         | 159915 | 4486  | 2.8 |                         |
|                      | 150-199         | 62029  | 2182  | 3.5 |                         |
|                      | 200-249         | 35361  | 973   | 2.8 |                         |
|                      | 250-299         | 26809  | 472   | 1.8 |                         |
|                      | 300-349         | 45282  | 897   | 2.0 |                         |
|                      | 350-399         | 27045  | 472   | 1.8 |                         |
|                      | 400-449         | 16387  | 332   | 2.0 |                         |
|                      | 450-499         | 13328  | 335   | 2.5 |                         |
|                      | > 500           | 7275   | 252   | 3.5 | (50-500+ collated 2.9%) |

## Stratified logistic regression

## 1. Natural causes of death

|                        |                           | Deaths        | Forensic autopsies | Per cent   |                 |             |                  |         |                      |              |                       |         |
|------------------------|---------------------------|---------------|--------------------|------------|-----------------|-------------|------------------|---------|----------------------|--------------|-----------------------|---------|
| <b>Total</b>           |                           | <b>830154</b> | <b>14339</b>       | <b>1.7</b> |                 |             |                  |         |                      |              |                       |         |
| Variable               | Level                     | Deaths        | For.aut.           | Per cent   | OR (univariate) | 95% CI      | LRT (univariate) | p value | OR (multi predictor) | 95% CI       | LRT (multi predictor) | p value |
| <b>Year</b>            | 1996-2002                 | 279172        | 4907               | 1.8        | 1               | Ref.        | 48.4             | < 0.001 | 1                    | Ref.         | 264.4                 | < 0.001 |
|                        | 2003-2010                 | 297300        | 4763               | 1.6        | 0.91            | (0.87-0.95) |                  |         | 1.02                 | (0.97-1.07)  |                       |         |
|                        | 2011-2017                 | 253682        | 4669               | 1.8        | 1.05            | (1.01-1.09) |                  |         | 1.42                 | (1.36-1.49)  |                       |         |
| <b>Sex</b>             | Male                      | 398889        | 10060              | 2.5        | 1               | Ref.        | 2920             | < 0.001 | 1                    | Ref.         | 220.2                 | < 0.001 |
|                        | Female                    | 431265        | 4279               | 1.0        | 0.39            | (0.37-0.40) |                  |         | 0.73                 | (0.70-0.77)  |                       |         |
| <b>Age</b>             | 20-29                     | 1887          | 391                | 20.7       | 1               | Ref.        | 28075            | < 0.001 | 1                    | Ref.         | 15033                 | < 0.001 |
|                        | 0-9                       | 5117          | 761                | 14.9       | 0.67            | (0.58-0.77) |                  |         | 1.08                 | (0.92-1.28)  |                       |         |
|                        | 10-19                     | 1045          | 183                | 17.5       | 0.81            | (0.67-0.99) |                  |         | 0.87                 | (0.68-1.10)  |                       |         |
|                        | 30-39                     | 4890          | 841                | 17.2       | 0.79            | (0.70-0.91) |                  |         | 0.79                 | (0.67-0.94)  |                       |         |
|                        | 40-49                     | 15671         | 1953               | 12.5       | 0.54            | (0.48-0.61) |                  |         | 0.47                 | (0.40-0.54)  |                       |         |
|                        | 50-59                     | 44050         | 3333               | 7.6        | 0.31            | (0.28-0.35) |                  |         | 0.26                 | (0.23-0.30)  |                       |         |
|                        | 60-69                     | 93084         | 3562               | 3.8        | 0.15            | (0.14-0.17) |                  |         | 0.14                 | (0.12-0.16)  |                       |         |
|                        | 70-79                     | 191927        | 2225               | 1.2        | 0.04            | (0.04-0.05) |                  |         | 0.05                 | (0.05-0.06)  |                       |         |
|                        | 80-89                     | 319518        | 960                | 0.3        | 0.01            | (0.01-0.01) |                  |         | 0.02                 | (0.02-0.02)  |                       |         |
|                        | 90 and above              | 152965        | 130                | 0.1        | 0.003           | (0-0.004)   |                  |         | 0.01                 | (0.01-0.01)  |                       |         |
| <b>Place of death</b>  | At_home                   | 114106        | 8848               | 7.8        | 1               | Ref.        | 36752            | < 0.001 | 1                    | Ref.         | 27602                 | < 0.001 |
|                        | Hospital                  | 325663        | 1829               | 0.6        | 0.07            | (0.06-0.07) |                  |         | 0.04                 | (0.04-0.04)  |                       |         |
|                        | Nursing_home              | 366813        | 214                | 0.1        | 0.01            | (0.01-0.01) |                  |         | 0.02                 | (0.01-0.02)  |                       |         |
|                        | Other_known               | 13787         | 2096               | 15.2       | 2.13            | (2.03-2.24) |                  |         | 1.92                 | (1.80-2.03)  |                       |         |
|                        | Unknown                   | 9785          | 1352               | 13.8       | 1.91            | (1.79-2.03) |                  |         | 2.10                 | (1.95-2.26)  |                       |         |
| <b>Police district</b> | Agder                     | 47483         | 255                | 0.5        | 1               | Ref.        | 6036             | < 0.001 | 1                    | Ref.         | 2820                  | < 0.001 |
|                        | Asker og Bærum            | 20569         | 388                | 1.9        | 3.56            | (3.04-4.17) |                  |         | 3.08                 | (2.32-4.08)  |                       |         |
|                        | Follo                     | 15759         | 218                | 1.4        | 2.60            | (2.17-3.12) |                  |         | 2.73                 | (2.03-3.68)  |                       |         |
|                        | Gudbrandsdal              | 16145         | 56                 | 0.3        | 0.65            | (0.48-0.86) |                  |         | 1.14                 | (0.77-1.67)  |                       |         |
|                        | Haugaland og Sunnhordland | 22500         | 505                | 2.2        | 4.25            | (3.66-4.95) |                  |         | 8.09                 | (6.26-10.48) |                       |         |
|                        | Hedmark                   | 43188         | 251                | 0.6        | 1.08            | (0.91-1.29) |                  |         | 1.93                 | (1.47-2.53)  |                       |         |
|                        | Helgeland                 | 14326         | 162                | 1.1        | 2.12            | (1.74-2.58) |                  |         | 3.59                 | (2.59-4.97)  |                       |         |
|                        | Hordaland                 | 69835         | 3009               | 4.3        | 8.32            | (7.34-9.49) |                  |         | 12.57                | (9.7-16.33)  |                       |         |
|                        | Midtre Hålogaland         | 24258         | 197                | 0.8        | 1.52            | (1.26-1.83) |                  |         | 2.69                 | (2.11-3.43)  |                       |         |
|                        | Nord-Trøndelag            | 25223         | 225                | 0.9        | 1.67            | (1.39-2.00) |                  |         | 2.36                 | (1.79-3.09)  |                       |         |
|                        | Nordmøre og Romsdal       | 21457         | 133                | 0.6        | 1.16            | (0.94-1.42) |                  |         | 1.87                 | (1.39-2.51)  |                       |         |
|                        | Nordre Buskerud           | 16685         | 170                | 1.0        | 1.91            | (1.57-2.32) |                  |         | 3.00                 | (2.23-4.04)  |                       |         |
|                        | Oslo                      | 95933         | 3048               | 3.2        | 6.07            | (5.35-6.91) |                  |         | 5.95                 | (4.59-7.74)  |                       |         |
|                        | Rogaland                  | 41720         | 1069               | 2.6        | 4.86            | (4.25-5.59) |                  |         | 5.46                 | (4.20-7.13)  |                       |         |
|                        | Romerike                  | 37429         | 321                | 0.9        | 1.60            | (1.36-1.89) |                  |         | 2.33                 | (1.75-3.10)  |                       |         |
|                        | Salten                    | 14237         | 240                | 1.7        | 3.18            | (2.66-3.79) |                  |         | 4.90                 | (3.50-6.86)  |                       |         |
|                        | Sogn og Fjordane          | 20349         | 215                | 1.1        | 1.98            | (1.65-2.37) |                  |         | 3.35                 | (2.57-4.37)  |                       |         |
| Sunnmøre               | 22806                     | 78            | 0.3                | 0.64       | (0.49-0.82)     |             |                  | 1.03    | (0.74-1.43)          |              |                       |         |

Forensic autopsies in Norway 1996-2017 – Supplementary tables

|                      |                 |        |      |     |                  |      |                   |   |      |               |
|----------------------|-----------------|--------|------|-----|------------------|------|-------------------|---|------|---------------|
|                      | Søndre Buskerud | 34027  | 611  | 1.8 | 3.38 (2.93-3.92) |      | 4.03 (3.09-5.28)  |   |      |               |
|                      | Sør-Trøndelag   | 48804  | 860  | 1.8 | 3.32 (2.89-3.82) |      | 3.71 (2.85-4.85)  |   |      |               |
|                      | Telemark        | 35241  | 600  | 1.7 | 3.20 (2.77-3.72) |      | 5.11 (3.98-6.58)  |   |      |               |
|                      | Troms           | 20680  | 294  | 1.4 | 2.67 (2.26-3.16) |      | 2.49 (1.88-3.30)  |   |      |               |
|                      | Vestfinnmark    | 6529   | 49   | 0.8 | 1.41 (1.03-1.90) |      | 1.47 (1.01-2.13)  |   |      |               |
|                      | Vestfold        | 39719  | 418  | 1.1 | 1.97 (1.69-2.30) |      | 3.44 (2.62-4.52)  |   |      |               |
|                      | Vestoppland     | 23346  | 123  | 0.5 | 0.98 (0.79-1.22) |      | 1.58 (1.17-2.14)  |   |      |               |
|                      | Østfinnmark     | 5607   | 80   | 1.4 | 2.69 (2.08-3.45) |      | 6.50 (3.65-11.67) |   |      |               |
|                      | Østfold         | 46299  | 764  | 1.7 | 3.10 (2.70-3.58) |      | 4.15 (3.16-5.46)  |   |      |               |
| <b>Municipality</b>  | < 2000          | 21851  | 284  | 1.3 | 1                | Ref. | 2414 < 0.001      | 1 | Ref. | 503.5 < 0.001 |
| <b>population</b>    | 2000-4999       | 72689  | 1041 | 1.4 | 1.10 (0.97-1.26) |      | 0.94 (0.81-1.09)  |   |      |               |
|                      | 5000-9999       | 95302  | 1123 | 1.2 | 0.90 (0.79-1.03) |      | 1.01 (0.87-1.19)  |   |      |               |
|                      | 10000-19999     | 124273 | 1455 | 1.2 | 0.90 (0.79-1.02) |      | 1.01 (0.86-1.19)  |   |      |               |
|                      | 20000-49999     | 202375 | 2171 | 1.1 | 0.82 (0.73-0.93) |      | 1.36 (1.16-1.61)  |   |      |               |
|                      | > 50000         | 313664 | 8265 | 2.6 | 2.05 (1.83-2.32) |      | 2.36 (2.00-2.79)  |   |      |               |
| <b>Urbanity</b>      | 0B (Most rural) | 85268  | 997  | 1.2 | 1                | Ref. | 1974 < 0.001      | 1 | Ref. | 60.5 < 0.001  |
| <b>index</b>         | 0A              | 20922  | 315  | 1.5 | 1.29 (1.14-1.47) |      | 1.01 (0.85-1.19)  |   |      |               |
|                      | 1B              | 34799  | 388  | 1.1 | 0.95 (0.85-1.07) |      | 1.58 (1.35-1.84)  |   |      |               |
|                      | 1A              | 32816  | 360  | 1.1 | 0.94 (0.83-1.06) |      | 1.27 (1.06-1.52)  |   |      |               |
|                      | 2B              | 65772  | 596  | 0.9 | 0.77 (0.70-0.86) |      | 1.22 (1.05-1.42)  |   |      |               |
|                      | 2A              | 175243 | 1938 | 1.1 | 0.94 (0.88-1.02) |      | 0.99 (0.85-1.16)  |   |      |               |
|                      | 3A (Most urban) | 415334 | 9745 | 2.3 | 2.03 (1.90-2.17) |      | 1.35 (1.14-1.59)  |   |      |               |
| <b>Distance</b>      | 0-49            | 344784 | 8943 | 2.6 | 1                | Ref. | 2932 < 0.001      | 1 | Ref. | 16.7 0.08     |
| <b>to autopsy</b>    | 50-99           | 129393 | 1800 | 1.4 | 0.53 (0.50-0.56) |      | 0.90 (0.82-1.00)  |   |      |               |
| <b>facility (km)</b> | 100-149         | 144691 | 1601 | 1.1 | 0.42 (0.40-0.44) |      | 0.96 (0.84-1.11)  |   |      |               |
|                      | 150-199         | 55959  | 768  | 1.4 | 0.52 (0.49-0.56) |      | 1.08 (0.91-1.29)  |   |      |               |
|                      | 200-249         | 31962  | 356  | 1.1 | 0.42 (0.38-0.47) |      | 1.11 (0.90-1.37)  |   |      |               |
|                      | 250-299         | 24281  | 137  | 0.6 | 0.21 (0.18-0.25) |      | 1.00 (0.76-1.32)  |   |      |               |
|                      | 300-349         | 41197  | 299  | 0.7 | 0.27 (0.24-0.31) |      | 0.97 (0.75-1.27)  |   |      |               |
|                      | 350-399         | 24521  | 143  | 0.6 | 0.22 (0.19-0.26) |      | 0.91 (0.65-1.27)  |   |      |               |
|                      | 400-449         | 14709  | 102  | 0.7 | 0.26 (0.22-0.32) |      | 0.88 (0.62-1.24)  |   |      |               |
|                      | 450-499         | 12091  | 108  | 0.9 | 0.34 (0.28-0.41) |      | 0.83 (0.57-1.21)  |   |      |               |
|                      | > 500           | 6566   | 82   | 1.2 | 0.48 (0.38-0.59) |      | 0.55 (0.30-0.97)  |   |      |               |

## 2. Ill-defined causes of death

|                 |                           | Deaths | Forensic autopsies | Per cent |                 |              |                  |         |                      |              |                       |         |
|-----------------|---------------------------|--------|--------------------|----------|-----------------|--------------|------------------|---------|----------------------|--------------|-----------------------|---------|
| Total           |                           | 30074  | 889                | 3.0      |                 |              |                  |         |                      |              |                       |         |
| Variable        | Level                     | Deaths | For.aut.           | Per cent | OR (univariate) | 95% CI       | LRT (univariate) | p value | OR (multi predictor) | 95% CI       | LRT (multi predictor) | p value |
| Year            | 1996-2002                 | 10049  | 397                | 4.0      | 1               | Ref.         | 50.9             | < 0.001 | 1                    | Ref.         | 71.5                  | < 0.001 |
|                 | 2003-2010                 | 10642  | 250                | 2.3      | 0.59            | (0.50-0.69)  |                  |         | 0.47                 | (0.39-0.57)  |                       |         |
|                 | 2011-2017                 | 9383   | 242                | 2.6      | 0.64            | (0.55-0.76)  |                  |         | 0.54                 | (0.45-0.66)  |                       |         |
| Sex             | Male                      | 11842  | 538                | 4.5      | 1               | Ref.         | 166.5            | < 0.001 | 1                    | Ref.         | 4.67                  | 0.03    |
|                 | Female                    | 18232  | 351                | 1.9      | 0.41            | (0.36-0.47)  |                  |         | 1.21                 | (1.02-1.43)  |                       |         |
| Age             | 20-29                     | 81     | 55                 | 67.9     | 1               | Ref.         | 1926             | < 0.001 | 1                    | Ref.         | 1425                  | < 0.001 |
|                 | 0-9                       | 35     | 20                 | 57.1     | 0.63            | (0.28-1.42)  |                  |         | 0.39                 | (0.15-1.03)  |                       |         |
|                 | 10-19                     | 26     | 19                 | 73.1     | 1.24            | (0.49-3.41)  |                  |         | 2.41                 | (0.78-8.18)  |                       |         |
|                 | 30-39                     | 165    | 72                 | 43.6     | 0.37            | (0.21-0.64)  |                  |         | 0.38                 | (0.19-0.74)  |                       |         |
|                 | 40-49                     | 410    | 108                | 26.3     | 0.17            | (0.10-0.28)  |                  |         | 0.09                 | (0.05-0.17)  |                       |         |
|                 | 50-59                     | 1144   | 154                | 13.5     | 0.07            | (0.04-0.12)  |                  |         | 0.04                 | (0.02-0.07)  |                       |         |
|                 | 60-69                     | 1981   | 96                 | 4.8      | 0.02            | (0.01-0.04)  |                  |         | 0.008                | (0-0.02)     |                       |         |
|                 | 70-79                     | 4312   | 173                | 4.0      | 0.02            | (0.01-0.03)  |                  |         | 0.004                | (0-0.008)    |                       |         |
|                 | 80-89                     | 10764  | 163                | 1.5      | 0.01            | (0-0.01)     |                  |         | 0.003                | (0-0.005)    |                       |         |
|                 | 90 and above              | 11156  | 29                 | 0.3      | 0.001           | (0-0.002)    |                  |         | 0.001                | (0-0.003)    |                       |         |
| Place of death  | At_home                   | 11275  | 658                | 5.8      | 1               | Ref.         | 1207             | < 0.001 | 1                    | Ref.         | 266.2                 | < 0.001 |
|                 | Hospital                  | 925    | 23                 | 2.5      | 0.42            | (0.27-0.62)  |                  |         | 0.30                 | (0.17-0.51)  |                       |         |
|                 | Nursing_home              | 14948  | 8                  | 0.1      | 0.01            | (0-0.02)     |                  |         | 0.04                 | (0.02-0.08)  |                       |         |
|                 | Other_known               | 1817   | 92                 | 5.1      | 0.86            | (0.69-1.08)  |                  |         | 0.61                 | (0.46-0.80)  |                       |         |
|                 | Unknown                   | 1109   | 108                | 9.7      | 1.75            | (1.40-2.15)  |                  |         | 1.75                 | (1.33-2.29)  |                       |         |
| Police district | Agder                     | 1836   | 14                 | 0.8      | 1               | Ref.         | 750.4            | < 0.001 | 1                    | Ref.         | 356.4                 | < 0.001 |
|                 | Asker og Bærum            | 646    | 10                 | 1.5      | 2.07            | (0.91-4.58)  |                  |         | 1.49                 | (0.33-7.19)  |                       |         |
|                 | Follo                     | 690    | 8                  | 1.2      | 1.57            | (0.64-3.60)  |                  |         | 2.24                 | (0.47-11.1)  |                       |         |
|                 | Gudbrandsdal              | 644    | 5                  | 0.8      | 1.08            | (0.37-2.75)  |                  |         | 1.06                 | (0.17-6.64)  |                       |         |
|                 | Haugaland og Sunnhordland | 620    | 5                  | 0.8      | 1.12            | (0.38-2.86)  |                  |         | 4.30                 | (0.90-20.6)  |                       |         |
|                 | Hedmark                   | 1681   | 14                 | 0.8      | 1.09            | (0.52-2.29)  |                  |         | 2.47                 | (0.63-10.5)  |                       |         |
|                 | Helgeland                 | 452    | 2                  | 0.4      | 0.70            | (0.14-2.28)  |                  |         | 0.65                 | (0.07-4.97)  |                       |         |
|                 | Hordaland                 | 2929   | 307                | 10.5     | 14.74           | (9.01-26.21) |                  |         | 16.8                 | (4.37-71.3)  |                       |         |
|                 | Midtre Hålogaland         | 784    | 8                  | 1.0      | 1.38            | (0.56-3.16)  |                  |         | 3.70                 | (0.94-13.8)  |                       |         |
|                 | Nord-Trøndelag            | 998    | 19                 | 1.9      | 2.50            | (1.27-5.05)  |                  |         | 10.8                 | (2.81-44.9)  |                       |         |
|                 | Nordmøre og Romsdal       | 925    | 3                  | 0.3      | 0.48            | (0.12-1.38)  |                  |         | 1.24                 | (0.21-6.64)  |                       |         |
|                 | Nordre Buskerud           | 850    | 6                  | 0.7      | 0.97            | (0.36-2.36)  |                  |         | 2.35                 | (0.46-12.2)  |                       |         |
|                 | Oslo                      | 3977   | 221                | 5.6      | 7.41            | (4.51-13.23) |                  |         | 4.28                 | (1.11-18.2)  |                       |         |
|                 | Rogaland                  | 1262   | 56                 | 4.4      | 5.89            | (3.38-10.93) |                  |         | 6.27                 | (1.59-27.2)  |                       |         |
|                 | Romerike                  | 1106   | 21                 | 1.9      | 2.49            | (1.28-4.97)  |                  |         | 2.90                 | (0.68-13.3)  |                       |         |
|                 | Salten                    | 472    | 19                 | 4.0      | 5.40            | (2.73-10.94) |                  |         | 15.2                 | (2.32-105.9) |                       |         |
|                 | Sogn og Fjordane          | 516    | 5                  | 1.0      | 1.35            | (0.46-3.44)  |                  |         | 3.06                 | (0.55-16.0)  |                       |         |
|                 | Sunnmøre                  | 619    | 0                  | 0        | 0.10            | (0-0.76)     |                  |         | 0.06                 | (0-0.80)     |                       |         |
|                 | Søndre Buskerud           | 1223   | 27                 | 2.2      | 2.89            | (1.55-5.63)  |                  |         | 4.99                 | (1.22-22.1)  |                       |         |
|                 | Sør-Trøndelag             | 2167   | 35                 | 1.6      | 2.09            | (1.16-3.99)  |                  |         | 1.59                 | (0.39-7.04)  |                       |         |

Forensic autopsies in Norway 1996-2017 – Supplementary tables

|                                          |                 |       |     |      |             |             |               |          |              |      |         |
|------------------------------------------|-----------------|-------|-----|------|-------------|-------------|---------------|----------|--------------|------|---------|
|                                          | Telemark        | 1217  | 23  | 1.9  | 2.47        | (1.29-4.89) |               | 4.57     | (1.24-18.5)  |      |         |
|                                          | Troms           | 573   | 15  | 2.6  | 3.49        | (1.69-7.26) |               | 2.15     | (0.50-9.89)  |      |         |
|                                          | Vestfinnmark    | 221   | 3   | 1.4  | 2.01        | (0.52-5.88) |               | 7.71     | (1.27-40.8)  |      |         |
|                                          | Vestfold        | 1191  | 21  | 1.8  | 2.31        | (1.19-4.61) |               | 7.41     | (1.86-32.4)  |      |         |
|                                          | Vestoppland     | 1040  | 6   | 0.6  | 0.79        | (0.29-1.92) |               | 2.02     | (0.42-9.84)  |      |         |
|                                          | Østfinnmark     | 167   | 3   | 1.8  | 2.67        | (0.69-7.83) |               | 65.4     | (6.03-832.7) |      |         |
|                                          | Østfold         | 1268  | 33  | 2.6  | 3.41        | (1.87-6.53) |               | 6.97     | (1.65-31.9)  |      |         |
| <b>Municipality population</b>           | < 2000          | 1064  | 10  | 0.9  | 1           | Ref.        | 516.5 < 0.001 | 1        | Ref.         | 60.8 | < 0.001 |
|                                          | 2000-4999       | 3640  | 30  | 0.8  | 0.85        | (0.43-1.8)  |               | 0.92     | (0.40-2.27)  |      |         |
|                                          | 5000-9999       | 4412  | 43  | 1.0  | 1.00        | (0.53-2.08) |               | 1.21     | (0.52-3.01)  |      |         |
|                                          | 10000-19999     | 4361  | 69  | 1.6  | 1.63        | (0.89-3.31) |               | 1.25     | (0.54-3.13)  |      |         |
|                                          | 20000-49999     | 5597  | 88  | 1.6  | 1.61        | (0.89-3.26) |               | 1.20     | (0.50-3.10)  |      |         |
|                                          | > 50000         | 11000 | 649 | 5.9  | 6.30        | (3.6-12.43) |               | 4.38     | (1.85-11.2)  |      |         |
| <b>Urbanity index</b>                    | 0B (Most rural) | 3799  | 33  | 0.9  | 1           | Ref.        | 310.6 < 0.001 | 1        | Ref.         | 5.41 | 0.49    |
|                                          | 0A              | 1242  | 12  | 1.0  | 1.14        | (0.57-2.14) |               | 1.64     | (0.61-4.26)  |      |         |
|                                          | 1B              | 982   | 11  | 1.1  | 1.33        | (0.65-2.53) |               | 0.72     | (0.27-1.83)  |      |         |
|                                          | 1A              | 1137  | 18  | 1.6  | 1.86        | (1.03-3.25) |               | 1.72     | (0.63-4.66)  |      |         |
|                                          | 2B              | 2039  | 27  | 1.3  | 1.54        | (0.92-2.55) |               | 1.43     | (0.59-3.46)  |      |         |
|                                          | 2A              | 5335  | 81  | 1.5  | 1.74        | (1.18-2.65) |               | 0.97     | (0.39-2.46)  |      |         |
|                                          | 3A (Most urban) | 15540 | 707 | 4.5  | 5.36        | (3.85-7.74) |               | 1.21     | (0.46-3.22)  |      |         |
| <b>Distance to autopsy facility (km)</b> | 0-49            | 12431 | 686 | 5.5  | 1           | Ref.        | 500.5 < 0.001 | 1        | Ref.         | 27.7 | 0.002   |
|                                          | 50-99           | 4562  | 72  | 1.6  | 0.28        | (0.21-0.35) |               | 0.61     | (0.35-1.05)  |      |         |
|                                          | 100-149         | 5303  | 62  | 1.2  | 0.20        | (0.16-0.26) |               | 0.61     | (0.29-1.29)  |      |         |
|                                          | 150-199         | 2264  | 25  | 1.1  | 0.19        | (0.13-0.28) |               | 1.08     | (0.40-2.90)  |      |         |
|                                          | 200-249         | 1272  | 11  | 0.9  | 0.16        | (0.08-0.27) |               | 1.35     | (0.39-4.50)  |      |         |
|                                          | 250-299         | 939   | 6   | 0.6  | 0.12        | (0.05-0.24) |               | 0.47     | (0.09-2.20)  |      |         |
|                                          | 300-349         | 1324  | 13  | 1.0  | 0.18        | (0.10-0.29) |               | 0.53     | (0.13-2.31)  |      |         |
|                                          | 350-399         | 931   | 3   | 0.3  | 0.06        | (0.02-0.16) |               | 1.56     | (0.22-10.1)  |      |         |
|                                          | 400-449         | 517   | 3   | 0.6  | 0.12        | (0.03-0.29) |               | 0.87     | (0.12-6.33)  |      |         |
|                                          | 450-499         | 316   | 7   | 2.2  | 0.41        | (0.18-0.80) |               | 2.58     | (0.33-21.0)  |      |         |
| > 500                                    | 215             | 1     | 0.5 | 0.12 | (0.01-0.43) |             | 0.04          | (0-0.66) |              |      |         |



## 3. Traffic accidents

|                 |                           | Deaths | Forensic autopsies | Per cent |                 |               |                  |         |                      |               |                       |         |
|-----------------|---------------------------|--------|--------------------|----------|-----------------|---------------|------------------|---------|----------------------|---------------|-----------------------|---------|
| Total           |                           | 5631   | 2946               | 52.3     |                 |               |                  |         |                      |               |                       |         |
| Variable        | Level                     | Deaths | For.aut.           | Per cent | OR (univariate) | 95% CI        | LRT (univariate) | p value | OR (multi predictor) | 95% CI        | LRT (multi predictor) | p value |
| Year            | 1996-2002                 | 2398   | 1228               | 51.2     | 1               | Ref.          | 30.2             | < 0.001 | 1                    | Ref.          | 30.9                  | < 0.001 |
|                 | 2003-2010                 | 2094   | 1041               | 49.7     | 0.94            | (0.84-1.06)   |                  |         | 0.87                 | (0.76-1.00)   |                       |         |
|                 | 2011-2017                 | 1139   | 677                | 59.4     | 1.40            | (1.21-1.61)   |                  |         | 1.42                 | (1.20-1.69)   |                       |         |
| Sex             | Male                      | 4134   | 2159               | 52.2     | 1               | Ref.          | 0.05             | 0.82    | 1                    | Ref.          | 1.76                  | 0.18    |
|                 | Female                    | 1497   | 787                | 52.6     | 1.01            | (0.90-1.14)   |                  |         | 1.10                 | (0.96-1.26)   |                       |         |
| Age             | 20-29                     | 1112   | 615                | 55.3     | 1               | Ref.          | 29.1             | < 0.001 | 1                    | Ref.          | 9.2                   | 0.41    |
|                 | 0-9                       | 156    | 73                 | 46.8     | 0.71            | (0.51-0.99)   |                  |         | 0.70                 | (0.47-1.04)   |                       |         |
|                 | 10-19                     | 729    | 404                | 55.4     | 1.00            | (0.83-1.21)   |                  |         | 1.01                 | (0.81-1.25)   |                       |         |
|                 | 30-39                     | 686    | 377                | 55.0     | 0.99            | (0.81-1.19)   |                  |         | 1.10                 | (0.88-1.37)   |                       |         |
|                 | 40-49                     | 643    | 352                | 54.7     | 0.98            | (0.80-1.19)   |                  |         | 1.04                 | (0.83-1.30)   |                       |         |
|                 | 50-59                     | 610    | 313                | 51.3     | 0.85            | (0.70-1.04)   |                  |         | 0.92                 | (0.73-1.16)   |                       |         |
|                 | 60-69                     | 543    | 269                | 49.5     | 0.79            | (0.65-0.97)   |                  |         | 0.93                 | (0.73-1.17)   |                       |         |
|                 | 70-79                     | 641    | 297                | 46.3     | 0.70            | (0.57-0.85)   |                  |         | 0.89                 | (0.70-1.11)   |                       |         |
|                 | 80-89                     | 461    | 227                | 49.2     | 0.78            | (0.63-0.97)   |                  |         | 1.07                 | (0.82-1.39)   |                       |         |
|                 | 90 and above              | 50     | 19                 | 38.0     | 0.50            | (0.28-0.88)   |                  |         | 0.67                 | (0.34-1.30)   |                       |         |
| Place of death  | At_home                   | 85     | 31                 | 36.5     | 1               | Ref.          | 158.5            | < 0.001 | 1                    | Ref.          | 295.9                 | < 0.001 |
|                 | Hospital                  | 1649   | 747                | 45.3     | 1.43            | (0.92-2.27)   |                  |         | 0.74                 | (0.44-1.28)   |                       |         |
|                 | Nursing_home              | 97     | 12                 | 12.4     | 0.25            | (0.12-0.52)   |                  |         | 0.18                 | (0.08-0.40)   |                       |         |
|                 | Other_known               | 3494   | 1946               | 55.7     | 2.17            | (1.40-3.42)   |                  |         | 2.86                 | (1.70-4.87)   |                       |         |
|                 | Unknown                   | 306    | 210                | 68.6     | 3.77            | (2.30-6.28)   |                  |         | 3.68                 | (2.06-6.66)   |                       |         |
| Police district | Agder                     | 420    | 95                 | 22.6     | 1               | Ref.          | 1132             | < 0.001 | 1                    | Ref.          | 831.2                 | < 0.001 |
|                 | Asker og Bærum            | 52     | 39                 | 75.0     | 9.97            | (5.29-19.92)  |                  |         | 5.77                 | (2.52-13.69)  |                       |         |
|                 | Follo                     | 150    | 94                 | 62.7     | 5.70            | (3.83-8.56)   |                  |         | 3.02                 | (1.63-5.63)   |                       |         |
|                 | Gudbrandsdal              | 143    | 8                  | 5.6      | 0.21            | (0.10-0.42)   |                  |         | 0.16                 | (0.06-0.39)   |                       |         |
|                 | Haugaland og Sunnhordland | 125    | 109                | 87.2     | 22.62           | (13.18-41.1)  |                  |         | 30.47                | (15.22-63.59) |                       |         |
|                 | Hedmark                   | 375    | 114                | 30.4     | 1.49            | (1.09-2.05)   |                  |         | 1.25                 | (0.78-2.03)   |                       |         |
|                 | Helgeland                 | 105    | 70                 | 66.7     | 6.77            | (4.29-10.86)  |                  |         | 5.81                 | (2.68-12.74)  |                       |         |
|                 | Hordaland                 | 400    | 344                | 86.0     | 20.78           | (14.57-30.09) |                  |         | 17.51                | (9.78-31.67)  |                       |         |
|                 | Midtre Hålogaland         | 151    | 89                 | 58.9     | 4.88            | (3.30-7.28)   |                  |         | 4.27                 | (2.45-7.48)   |                       |         |
|                 | Nord-Trøndelag            | 167    | 65                 | 38.9     | 2.18            | (1.48-3.20)   |                  |         | 1.62                 | (0.94-2.80)   |                       |         |
|                 | Nordmøre og Romsdal       | 141    | 53                 | 37.6     | 2.06            | (1.37-3.10)   |                  |         | 2.07                 | (1.16-3.68)   |                       |         |
|                 | Nordre Buskerud           | 171    | 65                 | 38.0     | 2.10            | (1.43-3.07)   |                  |         | 1.49                 | (0.84-2.64)   |                       |         |
|                 | Oslo                      | 626    | 355                | 56.7     | 4.46            | (3.39-5.91)   |                  |         | 4.21                 | (2.41-7.38)   |                       |         |
|                 | Rogaland                  | 289    | 251                | 86.9     | 22.27           | (14.95-33.91) |                  |         | 18.61                | (10.09-34.83) |                       |         |
|                 | Romerike                  | 218    | 113                | 51.8     | 3.67            | (2.59-5.22)   |                  |         | 2.31                 | (1.29-4.18)   |                       |         |
|                 | Salten                    | 110    | 80                 | 72.7     | 9.00            | (5.65-14.65)  |                  |         | 8.47                 | (3.82-19.2)   |                       |         |
|                 | Sogn og Fjordane          | 152    | 86                 | 56.6     | 4.43            | (3.00-6.59)   |                  |         | 4.64                 | (2.64-8.21)   |                       |         |
|                 | Sunnmøre                  | 134    | 27                 | 20.1     | 0.87            | (0.53-1.39)   |                  |         | 0.90                 | (0.47-1.72)   |                       |         |
|                 | Søndre Buskerud           | 203    | 113                | 55.7     | 4.27            | (3.00-6.13)   |                  |         | 2.92                 | (1.66-5.16)   |                       |         |
|                 | Sør-Trøndelag             | 344    | 218                | 63.4     | 5.89            | (4.31-8.11)   |                  |         | 4.83                 | (2.77-8.50)   |                       |         |

Forensic autopsies in Norway 1996-2017 – Supplementary tables

|                                          |                 |      |      |      |             |             |               |             |              |      |       |
|------------------------------------------|-----------------|------|------|------|-------------|-------------|---------------|-------------|--------------|------|-------|
|                                          | Telemark        | 210  | 148  | 70.5 | 8.10        | (5.6-11.83) |               | 9.21        | (5.4-15.87)  |      |       |
|                                          | Troms           | 243  | 122  | 50.2 | 3.44        | (2.45-4.84) |               | 2.85        | (1.60-5.10)  |      |       |
|                                          | Vestfinnmark    | 81   | 24   | 29.6 | 1.45        | (0.85-2.43) |               | 0.77        | (0.37-1.60)  |      |       |
|                                          | Vestfold        | 208  | 88   | 42.3 | 2.50        | (1.75-3.58) |               | 3.47        | (1.98-6.13)  |      |       |
|                                          | Vestoppland     | 159  | 26   | 16.4 | 0.68        | (0.41-1.07) |               | 0.67        | (0.35-1.23)  |      |       |
|                                          | Østfinnmark     | 49   | 18   | 36.7 | 2.00        | (1.06-3.68) |               | 0.78        | (0.18-3.07)  |      |       |
|                                          | Østfold         | 205  | 132  | 64.4 | 6.14        | (4.28-8.89) |               | 6.65        | (3.64-12.25) |      |       |
| <b>Municipality population</b>           | < 2000          | 251  | 132  | 52.6 | 1           | Ref.        | 121.9 < 0.001 | 1           | Ref.         | 11.8 | 0.04  |
|                                          | 2000-4999       | 826  | 417  | 50.5 | 0.92        | (0.69-1.22) |               | 0.91        | (0.64-1.29)  |      |       |
|                                          | 5000-9999       | 863  | 397  | 46.0 | 0.77        | (0.58-1.02) |               | 0.83        | (0.58-1.18)  |      |       |
|                                          | 10000-19999     | 913  | 513  | 56.2 | 1.16        | (0.87-1.53) |               | 1.03        | (0.69-1.52)  |      |       |
|                                          | 20000-49999     | 1064 | 442  | 41.5 | 0.64        | (0.49-0.84) |               | 0.76        | (0.51-1.13)  |      |       |
|                                          | > 50000         | 1714 | 1045 | 61.0 | 1.41        | (1.08-1.84) |               | 1.15        | (0.73-1.80)  |      |       |
| <b>Urbanity index</b>                    | 0B (Most rural) | 868  | 406  | 46.8 | 1           | Ref.        | 133.8 < 0.001 | 1           | Ref.         | 7.5  | 0.27  |
|                                          | 0A              | 197  | 121  | 61.4 | 1.81        | (1.32-2.48) |               | 1.11        | (0.72-1.72)  |      |       |
|                                          | 1B              | 254  | 128  | 50.4 | 1.16        | (0.87-1.53) |               | 1.04        | (0.71-1.53)  |      |       |
|                                          | 1A              | 276  | 145  | 52.5 | 1.26        | (0.96-1.65) |               | 1.47        | (0.94-2.32)  |      |       |
|                                          | 2B              | 428  | 198  | 46.3 | 0.98        | (0.78-1.24) |               | 1.15        | (0.78-1.69)  |      |       |
|                                          | 2A              | 921  | 363  | 39.4 | 0.74        | (0.61-0.89) |               | 0.88        | (0.57-1.34)  |      |       |
|                                          | 3A (Most urban) | 2687 | 1585 | 59.0 | 1.64        | (1.40-1.91) |               | 1.08        | (0.70-1.66)  |      |       |
| <b>Distance to autopsy facility (km)</b> | 0-49            | 2063 | 1306 | 63.3 | 1           | Ref.        | 319.5 < 0.001 | 1           | Ref.         | 28   | 0.002 |
|                                          | 50-99           | 938  | 518  | 55.2 | 0.71        | (0.61-0.84) |               | 0.67        | (0.51-0.88)  |      |       |
|                                          | 100-149         | 920  | 402  | 43.7 | 0.45        | (0.38-0.53) |               | 0.56        | (0.38-0.84)  |      |       |
|                                          | 150-199         | 469  | 266  | 56.7 | 0.76        | (0.62-0.93) |               | 0.75        | (0.46-1.22)  |      |       |
|                                          | 200-249         | 312  | 133  | 42.6 | 0.43        | (0.34-0.55) |               | 0.51        | (0.30-0.86)  |      |       |
|                                          | 250-299         | 192  | 39   | 20.3 | 0.15        | (0.10-0.21) |               | 0.35        | (0.18-0.67)  |      |       |
|                                          | 300-349         | 309  | 106  | 34.3 | 0.30        | (0.24-0.39) |               | 0.72        | (0.41-1.26)  |      |       |
|                                          | 350-399         | 197  | 60   | 30.5 | 0.26        | (0.18-0.35) |               | 0.47        | (0.24-0.91)  |      |       |
|                                          | 400-449         | 90   | 38   | 42.2 | 0.43        | (0.28-0.65) |               | 0.94        | (0.43-2.06)  |      |       |
|                                          | 450-499         | 92   | 58   | 63.0 | 0.98        | (0.64-1.52) |               | 0.86        | (0.37-2.04)  |      |       |
| > 500                                    | 49              | 20   | 40.8 | 0.40 | (0.22-0.71) |             | 1.69          | (0.41-7.51) |              |      |       |

## 4. Accidental falls

|                 |                           | Deaths | Forensic autopsies | Per cent |                 |              |                  |         |                      |              |                       |         |
|-----------------|---------------------------|--------|--------------------|----------|-----------------|--------------|------------------|---------|----------------------|--------------|-----------------------|---------|
| Total           |                           | 20306  | 1050               | 5.2      |                 |              |                  |         |                      |              |                       |         |
| Variable        | Level                     | Deaths | For.aut.           | Per cent | OR (univariate) | 95% CI       | LRT (univariate) | p value | OR (multi predictor) | 95% CI       | LRT (multi predictor) | p value |
| Year            | 1996-2002                 | 6199   | 352                | 5.7      | 1               | Ref.         | 6.03             | 0.05    | 1                    | Ref.         | 4.78                  | 0.09    |
|                 | 2003-2010                 | 6906   | 357                | 5.2      | 0.91            | (0.78-1.05)  |                  |         | 0.84                 | (0.68-1.03)  |                       |         |
|                 | 2011-2017                 | 7201   | 341                | 4.7      | 0.83            | (0.71-0.96)  |                  |         | 1.03                 | (0.84-1.27)  |                       |         |
| Sex             | Male                      | 8870   | 774                | 8.7      | 1               | Ref.         | 410.2            | < 0.001 | 1                    | Ref.         | 8.93                  | 0.002   |
|                 | Female                    | 11436  | 276                | 2.4      | 0.26            | (0.22-0.30)  |                  |         | 0.75                 | (0.63-0.91)  |                       |         |
| Age             | 20-29                     | 114    | 70                 | 61.4     | 1               | Ref.         | 3015             | < 0.001 | 1                    | Ref.         | 1069                  | < 0.001 |
|                 | 0-9                       | 16     | 6                  | 37.5     | 0.39            | (0.13-1.09)  |                  |         | 0.45                 | (0.12-1.59)  |                       |         |
|                 | 10-19                     | 50     | 28                 | 56.0     | 0.80            | (0.41-1.57)  |                  |         | 1.04                 | (0.48-2.27)  |                       |         |
|                 | 30-39                     | 121    | 71                 | 58.7     | 0.89            | (0.53-1.50)  |                  |         | 0.95                 | (0.51-1.75)  |                       |         |
|                 | 40-49                     | 231    | 127                | 55.0     | 0.77            | (0.49-1.21)  |                  |         | 1.04                 | (0.61-1.77)  |                       |         |
|                 | 50-59                     | 468    | 220                | 47.0     | 0.56            | (0.37-0.85)  |                  |         | 0.75                 | (0.46-1.22)  |                       |         |
|                 | 60-69                     | 813    | 205                | 25.2     | 0.21            | (0.14-0.32)  |                  |         | 0.34                 | (0.21-0.55)  |                       |         |
|                 | 70-79                     | 2782   | 168                | 6.0      | 0.04            | (0.03-0.06)  |                  |         | 0.10                 | (0.06-0.16)  |                       |         |
|                 | 80-89                     | 9227   | 128                | 1.4      | 0.01            | (0.01-0.01)  |                  |         | 0.03                 | (0.02-0.05)  |                       |         |
|                 | 90 and above              | 6484   | 27                 | 0.4      | 0.003           | (0-0.005)    |                  |         | 0.01                 | (0.01-0.02)  |                       |         |
| Place of death  | At_home                   | 1306   | 338                | 25.9     | 1               | Ref.         | 2457             | < 0.001 | 1                    | Ref.         | 872.4                 | < 0.001 |
|                 | Hospital                  | 9786   | 343                | 3.5      | 0.10            | (0.09-0.12)  |                  |         | 0.09                 | (0.07-0.12)  |                       |         |
|                 | Nursing_home              | 8470   | 23                 | 0.3      | 0.01            | (0.01-0.01)  |                  |         | 0.02                 | (0.01-0.04)  |                       |         |
|                 | Other_known               | 524    | 254                | 48.5     | 2.69            | (2.18-3.33)  |                  |         | 1.22                 | (0.90-1.65)  |                       |         |
|                 | Unknown                   | 220    | 92                 | 41.8     | 2.06            | (1.53-2.76)  |                  |         | 2.08                 | (1.39-3.10)  |                       |         |
| Police district | Agder                     | 1116   | 22                 | 2.0      | 1               | Ref.         | 386.1            | < 0.001 | 1                    | Ref.         | 226.2                 | < 0.001 |
|                 | Asker og Bærum            | 609    | 18                 | 3.0      | 1.52            | (0.81-2.83)  |                  |         | 2.89                 | (0.87-9.75)  |                       |         |
|                 | Follo                     | 335    | 13                 | 3.9      | 2.04            | (1.00-3.99)  |                  |         | 2.77                 | (0.78-9.99)  |                       |         |
|                 | Gudbrandsdal              | 438    | 5                  | 1.1      | 0.62            | (0.22-1.47)  |                  |         | 0.50                 | (0.12-2.09)  |                       |         |
|                 | Haugaland og Sunnhordland | 517    | 35                 | 6.8      | 3.58            | (2.1-6.22)   |                  |         | 11.81                | (4.09-35.44) |                       |         |
|                 | Hedmark                   | 937    | 12                 | 1.3      | 0.66            | (0.32-1.30)  |                  |         | 1.62                 | (0.52-5.15)  |                       |         |
|                 | Helgeland                 | 345    | 11                 | 3.2      | 1.67            | (0.79-3.37)  |                  |         | 4.26                 | (1.01-18.04) |                       |         |
|                 | Hordaland                 | 1614   | 196                | 12.1     | 6.74            | (4.42-10.78) |                  |         | 15.21                | (5.49-44.11) |                       |         |
|                 | Midtre Hålogaland         | 556    | 20                 | 3.6      | 1.86            | (1.01-3.42)  |                  |         | 2.33                 | (0.81-6.75)  |                       |         |
|                 | Nord-Trøndelag            | 574    | 20                 | 3.5      | 1.80            | (0.97-3.31)  |                  |         | 4.10                 | (1.39-12.39) |                       |         |
|                 | Nordmøre og Romsdal       | 530    | 16                 | 3.0      | 1.56            | (0.81-2.96)  |                  |         | 0.95                 | (0.31-2.97)  |                       |         |
|                 | Nordre Buskerud           | 446    | 16                 | 3.6      | 1.86            | (0.96-3.54)  |                  |         | 3.77                 | (1.16-12.52) |                       |         |
|                 | Oslo                      | 2606   | 214                | 8.2      | 4.36            | (2.87-6.96)  |                  |         | 6.63                 | (2.38-19.31) |                       |         |
|                 | Rogaland                  | 956    | 91                 | 9.5      | 5.14            | (3.28-8.42)  |                  |         | 12.51                | (4.43-36.96) |                       |         |
|                 | Romerike                  | 1081   | 33                 | 3.1      | 1.55            | (0.91-2.70)  |                  |         | 3.22                 | (1.05-10.23) |                       |         |
|                 | Salten                    | 362    | 21                 | 5.8      | 3.06            | (1.67-5.62)  |                  |         | 3.23                 | (0.73-14.7)  |                       |         |
|                 | Sogn og Fjordane          | 466    | 27                 | 5.8      | 3.04            | (1.73-5.42)  |                  |         | 2.06                 | (0.75-5.84)  |                       |         |
|                 | Sunnmøre                  | 554    | 8                  | 1.4      | 0.76            | (0.32-1.62)  |                  |         | 0.46                 | (0.13-1.55)  |                       |         |
|                 | Søndre Buskerud           | 853    | 22                 | 2.6      | 1.32            | (0.73-2.39)  |                  |         | 2.26                 | (0.74-7.11)  |                       |         |
|                 | Sør-Trøndelag             | 1203   | 69                 | 5.7      | 2.98            | (1.87-4.93)  |                  |         | 5.30                 | (1.86-15.78) |                       |         |

## Forensic autopsies in Norway 1996-2017 – Supplementary tables

|                                          |                 |       |     |      |             |              |               |          |               |       |      |
|------------------------------------------|-----------------|-------|-----|------|-------------|--------------|---------------|----------|---------------|-------|------|
|                                          | Telemark        | 846   | 38  | 4.5  | 2.32        | (1.38-3.98)  |               | 5.98     | (2.18-17.01)  |       |      |
|                                          | Troms           | 476   | 36  | 7.6  | 4.03        | (2.37-6.99)  |               | 3.04     | (1.01-9.45)   |       |      |
|                                          | Vestfinnmark    | 143   | 4   | 2.8  | 1.57        | (0.49-4.01)  |               | 1.55     | (0.33-6.55)   |       |      |
|                                          | Vestfold        | 976   | 38  | 3.9  | 2.00        | (1.19-3.43)  |               | 4.99     | (1.71-15.18)  |       |      |
|                                          | Vestoppland     | 608   | 11  | 1.8  | 0.94        | (0.44-1.88)  |               | 2.28     | (0.69-7.63)   |       |      |
|                                          | Østfinnmark     | 102   | 9   | 8.8  | 4.94        | (2.15-10.57) |               | 163.0    | (5.94-4252.3) |       |      |
|                                          | Østfold         | 1057  | 45  | 4.3  | 2.19        | (1.32-3.71)  |               | 5.17     | (1.65-16.72)  |       |      |
| <b>Municipality population</b>           | < 2000          | 408   | 29  | 7.1  | 1           | Ref.         | 139.7 < 0.001 | 1        | Ref.          | 10.14 | 0.07 |
|                                          | 2000-4999       | 1451  | 78  | 5.4  | 0.74        | (0.48-1.16)  |               | 1.35     | (0.69-2.67)   |       |      |
|                                          | 5000-9999       | 2118  | 94  | 4.4  | 0.60        | (0.40-0.94)  |               | 1.51     | (0.77-2.99)   |       |      |
|                                          | 10000-19999     | 3069  | 102 | 3.3  | 0.44        | (0.29-0.69)  |               | 1.25     | (0.61-2.60)   |       |      |
|                                          | 20000-49999     | 5197  | 165 | 3.2  | 0.42        | (0.29-0.65)  |               | 1.76     | (0.83-3.75)   |       |      |
|                                          | > 50000         | 8063  | 582 | 7.2  | 1.00        | (0.69-1.50)  |               | 2.48     | (1.16-5.37)   |       |      |
| <b>Urbanity index</b>                    | 0B (Most rural) | 1736  | 93  | 5.4  | 1           | Ref.         | 85.6 < 0.001  | 1        | Ref.          | 5.94  | 0.43 |
|                                          | 0A              | 430   | 32  | 7.4  | 1.43        | (0.94-2.15)  |               | 1.23     | (0.55-2.74)   |       |      |
|                                          | 1B              | 878   | 33  | 3.8  | 0.70        | (0.46-1.03)  |               | 1.40     | (0.70-2.76)   |       |      |
|                                          | 1A              | 748   | 31  | 4.1  | 0.77        | (0.50-1.15)  |               | 1.19     | (0.51-2.74)   |       |      |
|                                          | 2B              | 1623  | 53  | 3.3  | 0.60        | (0.42-0.84)  |               | 1.92     | (0.98-3.77)   |       |      |
|                                          | 2A              | 4256  | 138 | 3.2  | 0.59        | (0.45-0.78)  |               | 0.98     | (0.46-2.09)   |       |      |
|                                          | 3A (Most urban) | 10635 | 670 | 6.3  | 1.18        | (0.95-1.49)  |               | 0.88     | (0.40-1.94)   |       |      |
| <b>Distance to autopsy facility (km)</b> | 0-49            | 9014  | 626 | 6.9  | 1           | Ref.         | 122.7 < 0.001 | 1        | Ref.          | 10.13 | 0.43 |
|                                          | 50-99           | 3021  | 122 | 4.0  | 0.57        | (0.46-0.69)  |               | 0.86     | (0.52-1.41)   |       |      |
|                                          | 100-149         | 3470  | 120 | 3.5  | 0.48        | (0.39-0.59)  |               | 0.54     | (0.28-1.06)   |       |      |
|                                          | 150-199         | 1283  | 69  | 5.4  | 0.77        | (0.59-0.98)  |               | 0.90     | (0.39-2.07)   |       |      |
|                                          | 200-249         | 682   | 27  | 4.0  | 0.56        | (0.37-0.81)  |               | 0.62     | (0.24-1.63)   |       |      |
|                                          | 250-299         | 560   | 16  | 2.9  | 0.41        | (0.24-0.64)  |               | 0.75     | (0.23-2.42)   |       |      |
|                                          | 300-349         | 979   | 29  | 3.0  | 0.42        | (0.28-0.59)  |               | 0.75     | (0.26-2.19)   |       |      |
|                                          | 350-399         | 516   | 11  | 2.1  | 0.30        | (0.16-0.52)  |               | 0.65     | (0.16-2.68)   |       |      |
|                                          | 400-449         | 327   | 13  | 4.0  | 0.57        | (0.32-0.96)  |               | 0.62     | (0.15-2.49)   |       |      |
|                                          | 450-499         | 328   | 8   | 2.4  | 0.36        | (0.16-0.66)  |               | 0.37     | (0.07-1.83)   |       |      |
| > 500                                    | 126             | 9     | 7.1 | 1.08 | (0.52-2.00) |              | 0.04          | (0-1.08) |               |       |      |

## 5. Accidental poisonings

|                 |                           | Deaths | Forensic autopsies | Per cent |                 |              |                  |         |                      |               |                       |         |
|-----------------|---------------------------|--------|--------------------|----------|-----------------|--------------|------------------|---------|----------------------|---------------|-----------------------|---------|
| Total           |                           | 7719   | 6090               | 78.9     |                 |              |                  |         |                      |               |                       |         |
| Variable        | Level                     | Deaths | For.aut.           | Per cent | OR (univariate) | 95% CI       | LRT (univariate) | p value | OR (multi predictor) | 95% CI        | LRT (multi predictor) | p value |
| Year            | 1996-2002                 | 2363   | 1961               | 83.0     | 1               | Ref.         | 36.7             | < 0.001 | 1                    | Ref.          | 7.54                  | 0.02    |
|                 | 2003-2010                 | 2984   | 2319               | 77.7     | 0.72            | (0.62-0.82)  |                  |         | 0.84                 | (0.70-1.00)   |                       |         |
|                 | 2011-2017                 | 2372   | 1810               | 76.3     | 0.66            | (0.57-0.76)  |                  |         | 1.04                 | (0.86-1.26)   |                       |         |
| Sex             | Male                      | 5734   | 4624               | 80.6     | 1               | Ref.         | 39.5             | < 0.001 | 1                    | Ref.          | 2.72                  | 0.1     |
|                 | Female                    | 1985   | 1466               | 73.9     | 0.68            | (0.60-0.76)  |                  |         | 1.14                 | (0.98-1.34)   |                       |         |
| Age             | 20-29                     | 1551   | 1374               | 88.6     | 1               | Ref.         | 694.9            | < 0.001 | 1                    | Ref.          | 384.5                 | < 0.001 |
|                 | 0-9                       | 4      | 4                  | 100      | 1.16            | (0.12-154.3) |                  |         | 1.53                 | (0.11-225.1)  |                       |         |
|                 | 10-19                     | 142    | 133                | 93.7     | 1.81            | (0.97-3.82)  |                  |         | 3.73                 | (1.74-8.86)   |                       |         |
|                 | 30-39                     | 2088   | 1785               | 85.5     | 0.76            | (0.62-0.93)  |                  |         | 0.66                 | (0.52-0.83)   |                       |         |
|                 | 40-49                     | 1796   | 1413               | 78.7     | 0.48            | (0.39-0.58)  |                  |         | 0.44                 | (0.35-0.55)   |                       |         |
|                 | 50-59                     | 1268   | 950                | 74.9     | 0.39            | (0.31-0.47)  |                  |         | 0.30                 | (0.24-0.38)   |                       |         |
|                 | 60-69                     | 533    | 342                | 64.2     | 0.23            | (0.18-0.29)  |                  |         | 0.18                 | (0.13-0.24)   |                       |         |
|                 | 70-79                     | 180    | 62                 | 34.4     | 0.07            | (0.05-0.10)  |                  |         | 0.07                 | (0.05-0.11)   |                       |         |
|                 | 80-89                     | 112    | 17                 | 15.2     | 0.02            | (0.01-0.04)  |                  |         | 0.04                 | (0.02-0.07)   |                       |         |
|                 | 90 and above              | 45     | 10                 | 22.2     | 0.04            | (0.02-0.07)  |                  |         | 0.09                 | (0.04-0.20)   |                       |         |
| Place of death  | At_home                   | 3752   | 3107               | 82.8     | 1               | Ref.         | 1250             | < 0.001 | 1                    | Ref.          | 1009                  | < 0.001 |
|                 | Hospital                  | 1052   | 394                | 37.5     | 0.12            | (0.11-0.14)  |                  |         | 0.07                 | (0.06-0.09)   |                       |         |
|                 | Nursing_home              | 166    | 83                 | 50.0     | 0.21            | (0.15-0.28)  |                  |         | 0.23                 | (0.15-0.34)   |                       |         |
|                 | Other_known               | 1967   | 1781               | 90.5     | 1.98            | (1.67-2.36)  |                  |         | 1.52                 | (1.25-1.85)   |                       |         |
|                 | Unknown                   | 782    | 725                | 92.7     | 2.62            | (2.00-3.51)  |                  |         | 2.37                 | (1.76-3.25)   |                       |         |
| Police district | Agder                     | 350    | 163                | 46.6     | 1               | Ref.         | 962.8            | < 0.001 | 1                    | Ref.          | 453.9                 | < 0.001 |
|                 | Asker og Bærum            | 236    | 202                | 85.6     | 6.73            | (4.48-10.35) |                  |         | 11.68                | (4.81-28.84)  |                       |         |
|                 | Follo                     | 175    | 126                | 72.0     | 2.93            | (1.99-4.36)  |                  |         | 2.92                 | (1.25-6.89)   |                       |         |
|                 | Gudbrandsdal              | 66     | 30                 | 45.5     | 0.96            | (0.56-1.62)  |                  |         | 2.47                 | (0.93-6.65)   |                       |         |
|                 | Haugaland og Sunnhordland | 227    | 204                | 89.9     | 9.98            | (6.31-16.41) |                  |         | 30.47                | (13.54-70.31) |                       |         |
|                 | Hedmark                   | 210    | 109                | 51.9     | 1.24            | (0.88-1.74)  |                  |         | 2.38                 | (1.19-4.78)   |                       |         |
|                 | Helgeland                 | 59     | 51                 | 86.4     | 6.95            | (3.43-15.83) |                  |         | 22.08                | (5.79-94.9)   |                       |         |
|                 | Hordaland                 | 842    | 770                | 91.4     | 12.19           | (8.9-16.86)  |                  |         | 34.75                | (15.56-78.53) |                       |         |
|                 | Midtre Hålogaland         | 82     | 56                 | 68.3     | 2.45            | (1.49-4.11)  |                  |         | 5.83                 | (2.53-13.71)  |                       |         |
|                 | Nord-Trøndelag            | 93     | 59                 | 63.4     | 1.98            | (1.24-3.19)  |                  |         | 4.80                 | (2.15-10.91)  |                       |         |
|                 | Nordmøre og Romsdal       | 104    | 59                 | 56.7     | 1.50            | (0.97-2.34)  |                  |         | 2.96                 | (1.24-7.06)   |                       |         |
|                 | Nordre Buskerud           | 109    | 77                 | 70.6     | 2.73            | (1.74-4.38)  |                  |         | 3.87                 | (1.65-9.18)   |                       |         |
|                 | Oslo                      | 2141   | 1941               | 90.7     | 11.1            | (8.61-14.35) |                  |         | 22.21                | (10.13-49.2)  |                       |         |
|                 | Rogaland                  | 440    | 372                | 84.5     | 6.24            | (4.49-8.74)  |                  |         | 19.61                | (8.75-44.5)   |                       |         |
|                 | Romerike                  | 299    | 158                | 52.8     | 1.28            | (0.94-1.75)  |                  |         | 1.95                 | (0.86-4.46)   |                       |         |
|                 | Salten                    | 104    | 80                 | 76.9     | 3.77            | (2.32-6.31)  |                  |         | 20.54                | (6.34-68.35)  |                       |         |
|                 | Sogn og Fjordane          | 53     | 43                 | 81.1     | 4.75            | (2.43-10.11) |                  |         | 20.85                | (7.05-67.32)  |                       |         |
|                 | Sunnmøre                  | 79     | 35                 | 44.3     | 0.91            | (0.56-1.49)  |                  |         | 1.52                 | (0.61-3.81)   |                       |         |
|                 | Søndre Buskerud           | 401    | 317                | 79.1     | 4.31            | (3.14-5.95)  |                  |         | 7.26                 | (3.3-16.14)   |                       |         |
|                 | Sør-Trøndelag             | 337    | 274                | 81.3     | 4.96            | (3.53-7.03)  |                  |         | 11.29                | (4.97-25.91)  |                       |         |

Forensic autopsies in Norway 1996-2017 – Supplementary tables

|                                          |                 |      |      |      |             |              |               |             |               |      |      |
|------------------------------------------|-----------------|------|------|------|-------------|--------------|---------------|-------------|---------------|------|------|
|                                          | Telemark        | 277  | 239  | 86.3 | 7.13        | (4.83-10.76) |               | 22.27       | (10.11-49.88) |      |      |
|                                          | Troms           | 119  | 80   | 67.2 | 2.34        | (1.52-3.64)  |               | 7.30        | (3.04-17.72)  |      |      |
|                                          | Vestfinnmark    | 35   | 16   | 45.7 | 0.97        | (0.48-1.93)  |               | 2.48        | (0.84-7.31)   |      |      |
|                                          | Vestfold        | 317  | 198  | 62.5 | 1.90        | (1.40-2.60)  |               | 4.55        | (2.16-9.68)   |      |      |
|                                          | Vestoppland     | 135  | 76   | 56.3 | 1.47        | (0.99-2.20)  |               | 2.81        | (1.29-6.16)   |      |      |
|                                          | Østfinnmark     | 39   | 25   | 64.1 | 2.02        | (1.04-4.06)  |               | 16.91       | (2.67-129.0)  |      |      |
|                                          | Østfold         | 390  | 330  | 84.6 | 6.26        | (4.46-8.9)   |               | 22.27       | (9.67-51.97)  |      |      |
| <b>Municipality population</b>           | < 2000          | 87   | 54   | 62.1 | 1           | Ref.         | 324.6 < 0.001 | 1           | Ref.          | 4.58 | 0.47 |
|                                          | 2000-4999       | 302  | 210  | 69.5 | 1.40        | (0.85-2.29)  |               | 1.06        | (0.57-1.97)   |      |      |
|                                          | 5000-9999       | 512  | 361  | 70.5 | 1.47        | (0.91-2.34)  |               | 1.37        | (0.72-2.57)   |      |      |
|                                          | 10000-19999     | 786  | 572  | 72.8 | 1.64        | (1.03-2.58)  |               | 1.47        | (0.76-2.83)   |      |      |
|                                          | 20000-49999     | 1581 | 1066 | 67.4 | 1.27        | (0.81-1.97)  |               | 1.59        | (0.82-3.02)   |      |      |
|                                          | > 50000         | 4451 | 3827 | 86.0 | 3.77        | (2.41-5.81)  |               | 1.67        | (0.83-3.33)   |      |      |
| <b>Urbanity index</b>                    | 0B (Most rural) | 333  | 226  | 67.9 | 1           | Ref.         | 197.5 < 0.001 | 1           | Ref.          | 9.66 | 0.14 |
|                                          | 0A              | 84   | 63   | 75.0 | 1.40        | (0.83-2.45)  |               | 1.45        | (0.69-3.12)   |      |      |
|                                          | 1B              | 129  | 93   | 72.1 | 1.22        | (0.78-1.91)  |               | 1.20        | (0.63-2.35)   |      |      |
|                                          | 1A              | 192  | 124  | 64.6 | 0.86        | (0.59-1.26)  |               | 1.11        | (0.55-2.25)   |      |      |
|                                          | 2B              | 337  | 226  | 67.1 | 0.96        | (0.70-1.33)  |               | 1.05        | (0.60-1.83)   |      |      |
|                                          | 2A              | 1311 | 916  | 69.9 | 1.10        | (0.85-1.42)  |               | 1.01        | (0.54-1.90)   |      |      |
|                                          | 3A (Most urban) | 5333 | 4442 | 83.3 | 2.37        | (1.85-3.00)  |               | 1.90        | (0.99-3.61)   |      |      |
| <b>Distance to autopsy facility (km)</b> | 0-49            | 4710 | 4005 | 85.0 | 1           | Ref.         | 374.5 < 0.001 | 1           | Ref.          | 9.19 | 0.51 |
|                                          | 50-99           | 939  | 722  | 76.9 | 0.59        | (0.49-0.70)  |               | 0.89        | (0.63-1.27)   |      |      |
|                                          | 100-149         | 994  | 679  | 68.3 | 0.38        | (0.32-0.44)  |               | 1.23        | (0.76-2.00)   |      |      |
|                                          | 150-199         | 318  | 245  | 77.0 | 0.59        | (0.45-0.78)  |               | 1.71        | (0.86-3.43)   |      |      |
|                                          | 200-249         | 116  | 84   | 72.4 | 0.46        | (0.31-0.70)  |               | 2.22        | (0.99-5.04)   |      |      |
|                                          | 250-299         | 130  | 69   | 53.1 | 0.20        | (0.14-0.28)  |               | 1.80        | (0.74-4.42)   |      |      |
|                                          | 300-349         | 244  | 127  | 52.0 | 0.19        | (0.15-0.25)  |               | 1.45        | (0.65-3.24)   |      |      |
|                                          | 350-399         | 122  | 67   | 54.9 | 0.21        | (0.15-0.31)  |               | 1.41        | (0.56-3.60)   |      |      |
|                                          | 400-449         | 59   | 32   | 54.2 | 0.21        | (0.12-0.35)  |               | 1.68        | (0.58-4.87)   |      |      |
|                                          | 450-499         | 46   | 36   | 78.3 | 0.61        | (0.32-1.29)  |               | 0.80        | (0.20-3.25)   |      |      |
| > 500                                    | 41              | 24   | 58.5 | 0.25 | (0.13-0.46) |              | 0.42          | (0.06-2.61) |               |      |      |

**6. Other external causes of death**

|                        |                           | Deaths | Forensic autopsies | Per cent |                 |             |                  |         |                      |              |                       |         |
|------------------------|---------------------------|--------|--------------------|----------|-----------------|-------------|------------------|---------|----------------------|--------------|-----------------------|---------|
| Total                  |                           | 9094   | 3601               | 39.6     |                 |             |                  |         |                      |              |                       |         |
| Variable               | Level                     | Deaths | For.aut.           | Per cent | OR (univariate) | 95% CI      | LRT (univariate) | p value | OR (multi predictor) | 95% CI       | LRT (multi predictor) | p value |
| <b>Year</b>            | 1996-2002                 | 3028   | 1307               | 43.2     | 1               | Ref.        | 24.14            | < 0.001 | 1                    | Ref.         | 4.36                  | 0.11    |
|                        | 2003-2010                 | 3368   | 1280               | 38.0     | 0.81            | (0.73-0.89) |                  |         | 0.90                 | (0.79-1.04)  |                       |         |
|                        | 2011-2017                 | 2698   | 1014               | 37.6     | 0.79            | (0.71-0.88) |                  |         | 1.05                 | (0.90-1.22)  |                       |         |
| <b>Sex</b>             | Male                      | 5659   | 2720               | 48.1     | 1               | Ref.        | 462.3            | < 0.001 | 1                    | Ref.         | 0.27                  | 0.6     |
|                        | Female                    | 3435   | 881                | 25.6     | 0.37            | (0.34-0.41) |                  |         | 1.04                 | (0.90-1.19)  |                       |         |
| <b>Age</b>             | 20-29                     | 524    | 380                | 72.5     | 1               | Ref.        | 2487             | < 0.001 | 1                    | Ref.         | 699.1                 | < 0.001 |
|                        | 0-9                       | 220    | 134                | 60.9     | 0.59            | (0.42-0.82) |                  |         | 0.86                 | (0.58-1.26)  |                       |         |
|                        | 10-19                     | 225    | 145                | 64.4     | 0.69            | (0.49-0.96) |                  |         | 0.69                 | (0.47-1.01)  |                       |         |
|                        | 30-39                     | 634    | 455                | 71.8     | 0.96            | (0.74-1.25) |                  |         | 0.89                 | (0.66-1.19)  |                       |         |
|                        | 40-49                     | 838    | 592                | 70.6     | 0.91            | (0.72-1.16) |                  |         | 0.80                 | (0.61-1.06)  |                       |         |
|                        | 50-59                     | 1046   | 669                | 64.0     | 0.67            | (0.53-0.85) |                  |         | 0.62                 | (0.47-0.81)  |                       |         |
|                        | 60-69                     | 1099   | 547                | 49.8     | 0.38            | (0.30-0.47) |                  |         | 0.41                 | (0.31-0.53)  |                       |         |
|                        | 70-79                     | 1276   | 367                | 28.8     | 0.15            | (0.12-0.19) |                  |         | 0.20                 | (0.15-0.26)  |                       |         |
|                        | 80-89                     | 2047   | 268                | 13.1     | 0.06            | (0.05-0.07) |                  |         | 0.12                 | (0.09-0.16)  |                       |         |
|                        | 90 and above              | 1185   | 44                 | 3.7      | 0.01            | (0.01-0.02) |                  |         | 0.04                 | (0.03-0.07)  |                       |         |
| <b>Place of death</b>  | At_home                   | 1603   | 986                | 61.5     | 1               | Ref.        | 3603             | < 0.001 | 1                    | Ref.         | 1713                  | < 0.001 |
|                        | Hospital                  | 2476   | 451                | 18.2     | 0.14            | (0.12-0.16) |                  |         | 0.09                 | (0.07-0.10)  |                       |         |
|                        | Nursing_home              | 1967   | 42                 | 2.1      | 0.01            | (0.01-0.02) |                  |         | 0.02                 | (0.02-0.03)  |                       |         |
|                        | Other_known               | 2581   | 1746               | 67.6     | 1.31            | (1.15-1.49) |                  |         | 0.98                 | (0.84-1.16)  |                       |         |
|                        | Unknown                   | 467    | 376                | 80.5     | 2.58            | (2.02-3.32) |                  |         | 2.41                 | (1.82-3.21)  |                       |         |
| <b>Police district</b> | Agder                     | 557    | 142                | 25.5     | 1               | Ref.        | 435.6            | < 0.001 | 1                    | Ref.         | 349.8                 | < 0.001 |
|                        | Asker og Bærum            | 187    | 76                 | 40.6     | 2.00            | (1.41-2.83) |                  |         | 3.91                 | (1.95-7.85)  |                       |         |
|                        | Follo                     | 186    | 75                 | 40.3     | 1.97            | (1.39-2.80) |                  |         | 2.43                 | (1.21-4.88)  |                       |         |
|                        | Gudbrandsdal              | 152    | 21                 | 13.8     | 0.48            | (0.28-0.77) |                  |         | 0.40                 | (0.18-0.85)  |                       |         |
|                        | Haugaland og Sunnhordland | 281    | 169                | 60.1     | 4.39            | (3.25-5.97) |                  |         | 6.20                 | (3.53-10.95) |                       |         |
|                        | Hedmark                   | 391    | 88                 | 22.5     | 0.85            | (0.63-1.15) |                  |         | 0.94                 | (0.56-1.57)  |                       |         |
|                        | Helgeland                 | 205    | 88                 | 42.9     | 2.20            | (1.57-3.07) |                  |         | 2.26                 | (1.17-4.41)  |                       |         |
|                        | Hordaland                 | 827    | 441                | 53.3     | 3.33            | (2.64-4.22) |                  |         | 7.02                 | (4.04-12.21) |                       |         |
|                        | Midtre Hålogaland         | 302    | 105                | 34.8     | 1.56            | (1.15-2.11) |                  |         | 1.81                 | (1.09-3.02)  |                       |         |
|                        | Nord-Trøndelag            | 273    | 86                 | 31.5     | 1.35            | (0.98-1.85) |                  |         | 1.70                 | (0.98-2.94)  |                       |         |
|                        | Nordmøre og Romsdal       | 294    | 72                 | 24.5     | 0.95            | (0.68-1.31) |                  |         | 0.79                 | (0.46-1.37)  |                       |         |
|                        | Nordre Buskerud           | 203    | 78                 | 38.4     | 1.82            | (1.30-2.56) |                  |         | 2.15                 | (1.18-3.95)  |                       |         |
|                        | Oslo                      | 1025   | 455                | 44.4     | 2.33            | (1.86-2.93) |                  |         | 6.05                 | (3.46-10.63) |                       |         |
|                        | Rogaland                  | 385    | 196                | 50.9     | 3.02            | (2.30-3.99) |                  |         | 5.41                 | (3.00-9.80)  |                       |         |
|                        | Romerike                  | 320    | 98                 | 30.6     | 1.29            | (0.95-1.75) |                  |         | 1.49                 | (0.80-2.78)  |                       |         |
|                        | Salten                    | 188    | 96                 | 51.1     | 3.04            | (2.16-4.29) |                  |         | 3.65                 | (1.76-7.63)  |                       |         |
|                        | Sogn og Fjordane          | 235    | 93                 | 39.6     | 1.91            | (1.38-2.64) |                  |         | 2.51                 | (1.45-4.35)  |                       |         |
|                        | Sunnmøre                  | 242    | 45                 | 18.6     | 0.67            | (0.46-0.97) |                  |         | 0.59                 | (0.32-1.06)  |                       |         |
|                        | Søndre Buskerud           | 327    | 145                | 44.3     | 2.32            | (1.74-3.11) |                  |         | 3.79                 | (2.08-6.92)  |                       |         |
|                        | Sør-Trøndelag             | 531    | 233                | 43.9     | 2.28            | (1.77-2.95) |                  |         | 3.91                 | (2.22-6.90)  |                       |         |

## Forensic autopsies in Norway 1996-2017 – Supplementary tables

|                                          |                 |      |      |      |                  |              |                  |      |      |  |
|------------------------------------------|-----------------|------|------|------|------------------|--------------|------------------|------|------|--|
|                                          | Telemark        | 373  | 180  | 48.3 | 2.72 (2.06-3.60) |              | 4.89 (2.88-8.34) |      |      |  |
|                                          | Troms           | 313  | 116  | 37.1 | 1.72 (1.28-2.32) |              | 1.63 (0.91-2.93) |      |      |  |
|                                          | Vestfinnmark    | 130  | 52   | 40.0 | 1.95 (1.31-2.90) |              | 1.48 (0.78-2.79) |      |      |  |
|                                          | Vestfold        | 446  | 163  | 36.5 | 1.68 (1.28-2.21) |              | 2.04 (1.18-3.53) |      |      |  |
|                                          | Vestoppland     | 197  | 59   | 29.9 | 1.25 (0.87-1.79) |              | 1.29 (0.71-2.35) |      |      |  |
|                                          | Østfinnmark     | 92   | 45   | 48.9 | 2.79 (1.78-4.38) |              | 2.69 (0.97-7.56) |      |      |  |
|                                          | Østfold         | 432  | 184  | 42.6 | 2.16 (1.66-2.84) |              | 3.73 (2.07-6.72) |      |      |  |
| <b>Municipality population</b>           | < 2000          | 392  | 179  | 45.7 | 1 Ref.           | 63.7 < 0.001 | 1 Ref.           | 9.24 | 0.1  |  |
|                                          | 2000-4999       | 1154 | 530  | 45.9 | 1.01 (0.8-1.27)  |              | 1.18 (0.87-1.60) |      |      |  |
|                                          | 5000-9999       | 1165 | 433  | 37.2 | 0.70 (0.56-0.89) |              | 1.27 (0.91-1.77) |      |      |  |
|                                          | 10000-19999     | 1285 | 532  | 41.4 | 0.84 (0.67-1.06) |              | 1.60 (1.11-2.31) |      |      |  |
|                                          | 20000-49999     | 1929 | 642  | 33.3 | 0.59 (0.48-0.74) |              | 1.61 (1.10-2.36) |      |      |  |
|                                          | > 50000         | 3169 | 1285 | 40.5 | 0.81 (0.66-1.00) |              | 1.49 (0.99-2.25) |      |      |  |
| <b>Urbanity index</b>                    | 0B (Most rural) | 1316 | 551  | 41.9 | 1 Ref.           | 36.8 < 0.001 | 1 Ref.           | 4.44 | 0.61 |  |
|                                          | 0A              | 283  | 125  | 44.2 | 1.10 (0.85-1.42) |              | 0.91 (0.60-1.38) |      |      |  |
|                                          | 1B              | 418  | 166  | 39.7 | 0.92 (0.73-1.14) |              | 1.09 (0.76-1.58) |      |      |  |
|                                          | 1A              | 339  | 133  | 39.2 | 0.90 (0.70-1.14) |              | 1.45 (0.91-2.31) |      |      |  |
|                                          | 2B              | 769  | 259  | 33.7 | 0.71 (0.59-0.85) |              | 1.18 (0.85-1.66) |      |      |  |
|                                          | 2A              | 1666 | 585  | 35.1 | 0.75 (0.65-0.87) |              | 1.12 (0.75-1.68) |      |      |  |
|                                          | 3A (Most urban) | 4303 | 1782 | 41.4 | 0.98 (0.87-1.11) |              | 1.15 (0.76-1.74) |      |      |  |
| <b>Distance to autopsy facility (km)</b> | 0-49            | 3543 | 1505 | 42.5 | 1 Ref.           | 96.2 < 0.001 | 1 Ref.           | 16.8 | 0.08 |  |
|                                          | 50-99           | 1348 | 563  | 41.8 | 0.97 (0.86-1.10) |              | 0.87 (0.64-1.17) |      |      |  |
|                                          | 100-149         | 1504 | 558  | 37.1 | 0.80 (0.71-0.90) |              | 0.69 (0.47-1.02) |      |      |  |
|                                          | 150-199         | 695  | 308  | 44.3 | 1.08 (0.91-1.27) |              | 0.92 (0.57-1.49) |      |      |  |
|                                          | 200-249         | 428  | 175  | 40.9 | 0.94 (0.76-1.15) |              | 0.90 (0.54-1.52) |      |      |  |
|                                          | 250-299         | 297  | 80   | 26.9 | 0.50 (0.38-0.65) |              | 0.81 (0.44-1.49) |      |      |  |
|                                          | 300-349         | 487  | 146  | 30.0 | 0.58 (0.47-0.71) |              | 0.69 (0.39-1.22) |      |      |  |
|                                          | 350-399         | 317  | 85   | 26.8 | 0.50 (0.38-0.64) |              | 0.57 (0.29-1.10) |      |      |  |
|                                          | 400-449         | 208  | 66   | 31.7 | 0.63 (0.47-0.85) |              | 0.48 (0.24-0.96) |      |      |  |
|                                          | 450-499         | 163  | 66   | 40.5 | 0.92 (0.67-1.27) |              | 1.07 (0.49-2.35) |      |      |  |
|                                          | > 500           | 104  | 49   | 47.1 | 1.21 (0.82-1.78) |              | 0.67 (0.24-1.88) |      |      |  |



## 7. Suicides

|                        |                           | Deaths | Forensic autopsies | Per cent |                 |               |                  |         |                      |               |                       |         |
|------------------------|---------------------------|--------|--------------------|----------|-----------------|---------------|------------------|---------|----------------------|---------------|-----------------------|---------|
| Total                  |                           | 11984  | 7639               | 63.7     |                 |               |                  |         |                      |               |                       |         |
| Variable               | Level                     | Deaths | For.aut.           | Per cent | OR (univariate) | 95% CI        | LRT (univariate) | p value | OR (multi predictor) | 95% CI        | LRT (multi predictor) | p value |
| <b>Year</b>            | 1996-2002                 | 3769   | 2402               | 63.7     | 1               | Ref.          | 74.04            | < 0.001 | 1                    | Ref.          | 74.12                 | < 0.001 |
|                        | 2003-2010                 | 4212   | 2498               | 59.3     | 0.83            | (0.76-0.91)   |                  |         | 0.70                 | (0.63-0.79)   |                       |         |
|                        | 2011-2017                 | 4003   | 2739               | 68.4     | 1.23            | (1.12-1.35)   |                  |         | 1.15                 | (1.02-1.30)   |                       |         |
| <b>Sex</b>             | Male                      | 8561   | 5278               | 61.7     | 1               | Ref.          | 57.56            | < 0.001 | 1                    | Ref.          | 36.62                 | < 0.001 |
|                        | Female                    | 3423   | 2361               | 69.0     | 1.38            | (1.27-1.51)   |                  |         | 1.40                 | (1.26-1.56)   |                       |         |
| <b>Age</b>             | 20-29                     | 2057   | 1444               | 70.2     | 1               | Ref.          | 193.7            | < 0.001 | 1                    | Ref.          | 160.4                 | < 0.001 |
|                        | 0-9                       | 2      | 1                  | 50.0     | 0.42            | (0.02-10.75)  |                  |         | 0.35                 | (0-29.65)     |                       |         |
|                        | 10-19                     | 674    | 409                | 60.7     | 0.66            | (0.55-0.79)   |                  |         | 0.76                 | (0.61-0.96)   |                       |         |
|                        | 30-39                     | 2061   | 1407               | 68.3     | 0.91            | (0.80-1.04)   |                  |         | 0.89                 | (0.75-1.05)   |                       |         |
|                        | 40-49                     | 2291   | 1504               | 65.6     | 0.81            | (0.71-0.92)   |                  |         | 0.74                 | (0.63-0.87)   |                       |         |
|                        | 50-59                     | 2084   | 1334               | 64.0     | 0.76            | (0.66-0.86)   |                  |         | 0.68                 | (0.58-0.80)   |                       |         |
|                        | 60-69                     | 1395   | 833                | 59.7     | 0.63            | (0.55-0.73)   |                  |         | 0.56                 | (0.47-0.67)   |                       |         |
|                        | 70-79                     | 904    | 468                | 51.8     | 0.46            | (0.39-0.54)   |                  |         | 0.45                 | (0.37-0.55)   |                       |         |
|                        | 80-89                     | 456    | 216                | 47.4     | 0.38            | (0.31-0.47)   |                  |         | 0.27                 | (0.20-0.35)   |                       |         |
|                        | 90 and above              | 60     | 23                 | 38.3     | 0.26            | (0.15-0.44)   |                  |         | 0.16                 | (0.08-0.32)   |                       |         |
| <b>Place of death</b>  | At_home                   | 6145   | 3736               | 60.8     | 1               | Ref.          | 336.6            | < 0.001 | 1                    | Ref.          | 585.4                 | < 0.001 |
|                        | Hospital                  | 1202   | 601                | 50.0     | 0.64            | (0.57-0.73)   |                  |         | 0.21                 | (0.17-0.25)   |                       |         |
|                        | Nursing_home              | 121    | 53                 | 43.8     | 0.50            | (0.35-0.72)   |                  |         | 0.42                 | (0.26-0.69)   |                       |         |
|                        | Other_known               | 3326   | 2290               | 68.9     | 1.43            | (1.30-1.56)   |                  |         | 1.52                 | (1.35-1.70)   |                       |         |
|                        | Unknown                   | 1190   | 959                | 80.6     | 2.68            | (2.30-3.12)   |                  |         | 2.74                 | (2.27-3.31)   |                       |         |
| <b>Police district</b> | Agder                     | 688    | 162                | 23.5     | 1               | Ref.          | 4280             | < 0.001 | 1                    | Ref.          | 1847                  | < 0.001 |
|                        | Asker og Bærum            | 304    | 287                | 94.4     | 54.82           | (33.55-95.48) |                  |         | 26.88                | (13.79-54.52) |                       |         |
|                        | Follo                     | 372    | 200                | 53.8     | 3.78            | (2.89-4.95)   |                  |         | 1.78                 | (1.08-2.95)   |                       |         |
|                        | Gudbrandsdal              | 195    | 31                 | 15.9     | 0.61            | (0.40-0.92)   |                  |         | 0.32                 | (0.17-0.61)   |                       |         |
|                        | Haugaland og Sunnhordland | 320    | 288                | 90.0     | 29.22           | (19.75-44.54) |                  |         | 31.89                | (18.7-55.51)  |                       |         |
|                        | Hedmark                   | 591    | 142                | 24.0     | 1.03            | (0.79-1.33)   |                  |         | 0.95                 | (0.62-1.47)   |                       |         |
|                        | Helgeland                 | 190    | 87                 | 45.8     | 2.74            | (1.96-3.84)   |                  |         | 4.23                 | (2.37-7.59)   |                       |         |
|                        | Hordaland                 | 1032   | 962                | 93.2     | 44.62           | (33.27-60.63) |                  |         | 27.62                | (16.68-46.13) |                       |         |
|                        | Midtre Hålogaland         | 243    | 85                 | 35.0     | 1.75            | (1.27-2.40)   |                  |         | 2.31                 | (1.46-3.66)   |                       |         |
|                        | Nord-Trøndelag            | 297    | 91                 | 30.6     | 1.43            | (1.06-1.94)   |                  |         | 0.92                 | (0.58-1.47)   |                       |         |
|                        | Nordmøre og Romsdal       | 240    | 88                 | 36.7     | 1.88            | (1.37-2.58)   |                  |         | 2.05                 | (1.24-3.39)   |                       |         |
|                        | Nordre Buskerud           | 251    | 102                | 40.6     | 2.22            | (1.63-3.02)   |                  |         | 1.65                 | (1.00-2.73)   |                       |         |
|                        | Oslo                      | 1614   | 1508               | 93.4     | 46.19           | (35.62-60.43) |                  |         | 25.92                | (15.74-42.92) |                       |         |
|                        | Rogaland                  | 717    | 656                | 91.5     | 34.92           | (25.64-48.27) |                  |         | 22.65                | (13.55-38.19) |                       |         |
|                        | Romerike                  | 488    | 187                | 38.3     | 2.02            | (1.57-2.60)   |                  |         | 1.04                 | (0.63-1.70)   |                       |         |
|                        | Salten                    | 200    | 139                | 69.5     | 7.40            | (5.24-10.54)  |                  |         | 5.02                 | (2.64-9.62)   |                       |         |
|                        | Sogn og Fjordane          | 190    | 118                | 62.1     | 5.32            | (3.79-7.52)   |                  |         | 5.14                 | (3.17-8.41)   |                       |         |
|                        | Sunnmøre                  | 243    | 43                 | 17.7     | 0.70            | (0.48-1.01)   |                  |         | 0.74                 | (0.43-1.27)   |                       |         |
|                        | Søndre Buskerud           | 541    | 375                | 69.3     | 7.33            | (5.70-9.48)   |                  |         | 3.98                 | (2.48-6.40)   |                       |         |
|                        | Sør-Trøndelag             | 678    | 556                | 82.0     | 14.8            | (11.41-19.33) |                  |         | 8.46                 | (5.22-13.8)   |                       |         |

Forensic autopsies in Norway 1996-2017 – Supplementary tables

|                                          |                 |      |      |      |       |               |               |       |              |               |
|------------------------------------------|-----------------|------|------|------|-------|---------------|---------------|-------|--------------|---------------|
|                                          | Telemark        | 505  | 412  | 81.6 | 14.38 | (10.85-19.23) |               | 14.6  | (9.31-23.08) |               |
|                                          | Troms           | 301  | 157  | 52.2 | 3.54  | (2.66-4.72)   |               | 2.08  | (1.26-3.45)  |               |
|                                          | Vestfinnmark    | 108  | 38   | 35.2 | 1.76  | (1.14-2.70)   |               | 1.72  | (0.93-3.18)  |               |
|                                          | Vestfold        | 684  | 303  | 44.3 | 2.58  | (2.05-3.26)   |               | 2.32  | (1.48-3.66)  |               |
|                                          | Vestoppland     | 324  | 93   | 28.7 | 1.31  | (0.97-1.76)   |               | 1.21  | (0.76-1.95)  |               |
|                                          | Østfinnmark     | 104  | 53   | 51.0 | 3.37  | (2.21-5.16)   |               | 4.36  | (1.66-11.26) |               |
|                                          | Østfold         | 564  | 476  | 84.4 | 17.56 | (13.23-23.53) |               | 12.85 | (7.74-21.46) |               |
| <b>Municipality population</b>           | < 2000          | 314  | 157  | 50.0 | 1     | Ref.          | 1694 < 0.001  | 1     | Ref.         | 25.71 < 0.001 |
|                                          | 2000-4999       | 1218 | 587  | 48.2 | 0.93  | (0.73-1.19)   |               | 0.85  | (0.63-1.16)  |               |
|                                          | 5000-9999       | 1443 | 688  | 47.7 | 0.91  | (0.71-1.16)   |               | 1.10  | (0.80-1.51)  |               |
|                                          | 10000-19999     | 1875 | 965  | 51.5 | 1.06  | (0.83-1.35)   |               | 1.16  | (0.83-1.62)  |               |
|                                          | 20000-49999     | 2610 | 1353 | 51.8 | 1.08  | (0.85-1.36)   |               | 1.36  | (0.97-1.90)  |               |
|                                          | > 50000         | 4524 | 3889 | 86.0 | 6.12  | (4.83-7.76)   |               | 1.60  | (1.10-2.31)  |               |
| <b>Urbanity index</b>                    | 0B (Most rural) | 1157 | 544  | 47.0 | 1     | Ref.          | 905.4 < 0.001 | 1     | Ref.         | 8.78 0.19     |
|                                          | 0A              | 298  | 181  | 60.7 | 1.74  | (1.35-2.26)   |               | 0.76  | (0.52-1.10)  |               |
|                                          | 1B              | 393  | 194  | 49.4 | 1.10  | (0.87-1.38)   |               | 1.01  | (0.72-1.40)  |               |
|                                          | 1A              | 458  | 214  | 46.7 | 0.99  | (0.80-1.23)   |               | 0.86  | (0.58-1.28)  |               |
|                                          | 2B              | 804  | 333  | 41.4 | 0.80  | (0.66-0.96)   |               | 0.73  | (0.54-0.99)  |               |
|                                          | 2A              | 2379 | 1271 | 53.4 | 1.29  | (1.12-1.49)   |               | 0.69  | (0.49-0.96)  |               |
|                                          | 3A (Most urban) | 6495 | 4902 | 75.5 | 3.47  | (3.05-3.94)   |               | 0.72  | (0.51-1.03)  |               |
| <b>Distance to autopsy facility (km)</b> | 0-49            | 5307 | 4373 | 82.4 | 1     | Ref.          | 1905 < 0.001  | 1     | Ref.         | 56.85 < 0.001 |
|                                          | 50-99           | 1917 | 1169 | 61.0 | 0.33  | (0.30-0.37)   |               | 0.71  | (0.57-0.87)  |               |
|                                          | 100-149         | 1993 | 967  | 48.5 | 0.20  | (0.18-0.23)   |               | 0.48  | (0.36-0.63)  |               |
|                                          | 150-199         | 760  | 465  | 61.2 | 0.34  | (0.29-0.40)   |               | 0.50  | (0.34-0.73)  |               |
|                                          | 200-249         | 423  | 167  | 39.5 | 0.14  | (0.11-0.17)   |               | 0.36  | (0.23-0.55)  |               |
|                                          | 250-299         | 308  | 108  | 35.1 | 0.12  | (0.09-0.15)   |               | 0.50  | (0.30-0.84)  |               |
|                                          | 300-349         | 515  | 142  | 27.6 | 0.08  | (0.07-0.10)   |               | 0.36  | (0.22-0.58)  |               |
|                                          | 350-399         | 331  | 92   | 27.8 | 0.08  | (0.06-0.11)   |               | 0.40  | (0.23-0.70)  |               |
|                                          | 400-449         | 182  | 57   | 31.3 | 0.10  | (0.07-0.13)   |               | 0.32  | (0.18-0.59)  |               |
|                                          | 450-499         | 141  | 43   | 30.5 | 0.09  | (0.06-0.13)   |               | 0.15  | (0.07-0.29)  |               |
|                                          | > 500           | 107  | 56   | 52.3 | 0.23  | (0.16-0.35)   |               | 0.35  | (0.13-0.91)  |               |

**8. Homicides**

|                        |                           | Deaths     | Forensic autopsies | Per cent    |                 |              |                  |         |                      |               |                       |         |
|------------------------|---------------------------|------------|--------------------|-------------|-----------------|--------------|------------------|---------|----------------------|---------------|-----------------------|---------|
| <b>Total</b>           |                           | <b>874</b> | <b>844</b>         | <b>96.6</b> |                 |              |                  |         |                      |               |                       |         |
| Variable               | Level                     | Deaths     | For.aut.           | Per cent    | OR (univariate) | 95% CI       | LRT (univariate) | p value | OR (multi predictor) | 95% CI        | LRT (multi predictor) | p value |
| <b>Year</b>            | 1996-2002                 | 292        | 279                | 95.5        | 1               | Ref.         | 2.41             | 0.3     | 1                    | Ref.          | 3.11                  | 0.21    |
|                        | 2003-2010                 | 282        | 276                | 97.9        | 2.05            | (0.82-5.69)  |                  |         | 2.43                 | (0.85-8.25)   |                       |         |
|                        | 2011-2017                 | 300        | 289                | 96.3        | 1.22            | (0.54-2.76)  |                  |         | 1.07                 | (0.4-3.24)    |                       |         |
| <b>Sex</b>             | Male                      | 512        | 495                | 96.7        | 1               | Ref.         | 0.06             | 0.81    | 1                    | Ref.          | 0.36                  | 0.55    |
|                        | Female                    | 362        | 349                | 96.4        | 0.91            | (0.45-1.92)  |                  |         | 0.77                 | (0.32-1.83)   |                       |         |
| <b>Age</b>             | 20-29                     | 162        | 155                | 95.7        | 1               | Ref.         | 10.2             | 0.33    | 1                    | Ref.          | 10.2                  | 0.33    |
|                        | 0-9                       | 46         | 46                 | 100         | 4.49            | (0.53-586.2) |                  |         | 3.00                 | (0.33-462.8)  |                       |         |
|                        | 10-19                     | 110        | 108                | 98.2        | 2.09            | (0.55-11.37) |                  |         | 1.43                 | (0.33-8.44)   |                       |         |
|                        | 30-39                     | 171        | 162                | 94.7        | 0.83            | (0.30-2.20)  |                  |         | 0.96                 | (0.30-2.86)   |                       |         |
|                        | 40-49                     | 154        | 147                | 95.5        | 0.95            | (0.33-2.73)  |                  |         | 1.72                 | (0.50-5.95)   |                       |         |
|                        | 50-59                     | 111        | 109                | 98.2        | 2.11            | (0.55-11.47) |                  |         | 5.46                 | (0.87-54.71)  |                       |         |
|                        | 60-69                     | 64         | 64                 | 100         | 6.22            | (0.74-811.9) |                  |         | 9.68                 | (0.84-1949.1) |                       |         |
|                        | 70-79                     | 32         | 31                 | 96.9        | 1.01            | (0.21-9.84)  |                  |         | 4.75                 | (0.54-645.6)  |                       |         |
|                        | 80-89                     | 20         | 18                 | 90.0        | 0.36            | (0.09-2.02)  |                  |         | 1.28                 | (0.22-9.95)   |                       |         |
|                        | 90 and above              | 4          | 4                  | 100         | 0.43            | (0.04-59.51) |                  |         | 0.12                 | (0.01-18.38)  |                       |         |
| <b>Place of death</b>  | At_home                   | 309        | 302                | 97.7        | 1               | Ref.         | 12.1             | 0.02    | 1                    | Ref.          | 13.11                 | 0.01    |
|                        | Hospital                  | 147        | 142                | 96.6        | 0.64            | (0.21-2.08)  |                  |         | 0.54                 | (0.14-2.09)   |                       |         |
|                        | Nursing_home              | 4          | 2                  | 50.0        | 0.02            | (0-0.18)     |                  |         | 0.01                 | (0-0.12)      |                       |         |
|                        | Other_known               | 314        | 303                | 96.5        | 0.65            | (0.25-1.64)  |                  |         | 0.51                 | (0.17-1.39)   |                       |         |
|                        | Unknown                   | 100        | 95                 | 95.0        | 0.43            | (0.14-1.40)  |                  |         | 0.36                 | (0.10-1.31)   |                       |         |
| <b>Police district</b> | Agder                     | 57         | 53                 | 93.0        | 1               | Ref.         | 40.0             | 0.04    | 1                    | Ref.          | 33.2                  | 0.16    |
|                        | Asker og Bærum            | 21         | 21                 | 100         | 3.62            | (0.36-487.1) |                  |         | 0.43                 | (0-896.3)     |                       |         |
|                        | Follo                     | 18         | 17                 | 94.4        | 0.98            | (0.17-10.27) |                  |         | 0.09                 | (0-102.5)     |                       |         |
|                        | Gudbrandsdal              | 4          | 4                  | 100         | 0.76            | (0.06-106.3) |                  |         | 0.06                 | (0-525.9)     |                       |         |
|                        | Haugaland og Sunnhordland | 19         | 19                 | 100         | 3.28            | (0.33-442.3) |                  |         | 0.58                 | (0-560.2)     |                       |         |
|                        | Hedmark                   | 24         | 24                 | 100         | 4.12            | (0.41-554.2) |                  |         | 5.56                 | (0-10473)     |                       |         |
|                        | Helgeland                 | 10         | 10                 | 100         | 1.77            | (0.17-240.7) |                  |         | 0.02                 | (0-84.25)     |                       |         |
|                        | Hordaland                 | 67         | 67                 | 100         | 11.36           | (1.17-1517)  |                  |         | 4.01                 | (0-11929)     |                       |         |
|                        | Midtre Hålogaland         | 11         | 10                 | 90.9        | 0.59            | (0.10-6.31)  |                  |         | 0.03                 | (0-57.81)     |                       |         |
|                        | Nord-Trøndelag            | 7          | 7                  | 100         | 1.26            | (0.11-173.5) |                  |         | 0.48                 | (0-220.82)    |                       |         |
|                        | Nordmøre og Romsdal       | 10         | 9                  | 90.0        | 0.53            | (0.08-5.74)  |                  |         | 0.54                 | (0-78.35)     |                       |         |
|                        | Nordre Buskerud           | 79         | 79                 | 100         | 13.37           | (1.38-1786)  |                  |         | 3.59                 | (0-7508)      |                       |         |
|                        | Oslo                      | 216        | 213                | 98.6        | 5.13            | (1.21-23.56) |                  |         | 0.68                 | (0-512.6)     |                       |         |
|                        | Rogaland                  | 47         | 45                 | 95.7        | 1.53            | (0.32-9.12)  |                  |         | 0.33                 | (0-202.42)    |                       |         |
|                        | Romerike                  | 32         | 28                 | 87.5        | 0.53            | (0.13-2.21)  |                  |         | 0.03                 | (0-33.76)     |                       |         |
|                        | Salten                    | 9          | 9                  | 100         | 1.60            | (0.15-218.3) |                  |         | 0.01                 | (0-211.7)     |                       |         |
|                        | Sogn og Fjordane          | 8          | 8                  | 100         | 1.43            | (0.13-195.9) |                  |         | 0.98                 | (0-735.5)     |                       |         |
|                        | Sunnmøre                  | 17         | 17                 | 100         | 2.94            | (0.29-397.5) |                  |         | 0.40                 | (0-432.2)     |                       |         |
|                        | Søndre Buskerud           | 27         | 27                 | 100         | 4.63            | (0.47-621.4) |                  |         | 0.26                 | (0-596.2)     |                       |         |
|                        | Sør-Trøndelag             | 36         | 32                 | 88.9        | 0.61            | (0.15-2.51)  |                  |         | 0.10                 | (0-68.81)     |                       |         |

Forensic autopsies in Norway 1996-2017 – Supplementary tables

|                                          |                 |     |      |      |             |              |      |      |            |              |      |      |
|------------------------------------------|-----------------|-----|------|------|-------------|--------------|------|------|------------|--------------|------|------|
|                                          | Telemark        | 35  | 33   | 94.3 | 1.13        | (0.24-6.76)  |      |      | 0.14       | (0-37.01)    |      |      |
|                                          | Troms           | 25  | 22   | 88   | 0.54        | (0.12-2.59)  |      |      | 0.06       | (0-41.28)    |      |      |
|                                          | Vestfinnmark    | 11  | 9    | 81.8 | 0.32        | (0.06-2.04)  |      |      | 0.001      | (0-2.86)     |      |      |
|                                          | Vestfold        | 28  | 28   | 100  | 4.79        | (0.48-643.8) |      |      | 0.10       | (0-217.89)   |      |      |
|                                          | Vestoppland     | 18  | 18   | 100  | 3.11        | (0.31-419.9) |      |      | 0.09       | (0-229.39)   |      |      |
|                                          | Østfinnmark     | 11  | 9    | 81.8 | 0.32        | (0.06-2.04)  |      |      | 0.001      | (0-10.55)    |      |      |
|                                          | Østfold         | 27  | 26   | 96.3 | 1.49        | (0.26-15.37) |      |      | 0.06       | (0-297.82)   |      |      |
| <b>Municipality population</b>           | < 2000          | 16  | 15   | 93.8 | 1           | Ref.         | 7.65 | 0.18 | 1          | Ref.         | 4.73 | 0.45 |
|                                          | 2000-4999       | 50  | 50   | 100  | 9.77        | (0.5-1456)   |      |      | 11.64      | (0.12-78019) |      |      |
|                                          | 5000-9999       | 154 | 149  | 96.8 | 2.63        | (0.26-14.43) |      |      | 0.98       | (0.01-30.92) |      |      |
|                                          | 10000-19999     | 108 | 100  | 92.6 | 1.14        | (0.12-5.65)  |      |      | 0.94       | (0.01-15.93) |      |      |
|                                          | 20000-49999     | 127 | 122  | 96.1 | 2.16        | (0.21-11.84) |      |      | 2.31       | (0.02-67.8)  |      |      |
|                                          | > 50000         | 419 | 408  | 97.4 | 3.44        | (0.36-15.97) |      |      | 1.33       | (0.01-25.98) |      |      |
| <b>Urbanity index</b>                    | 0B (Most rural) | 56  | 53   | 94.6 | 1           | Ref.         | 3.87 | 0.69 | 1          | Ref.         | 7.38 | 0.28 |
|                                          | 0A              | 17  | 16   | 94.1 | 0.72        | (0.11-7.81)  |      |      | 0.16       | (0-33.36)    |      |      |
|                                          | 1B              | 18  | 17   | 94.4 | 0.76        | (0.12-8.26)  |      |      | 5.60       | (0.28-1629)  |      |      |
|                                          | 1A              | 33  | 32   | 97   | 1.42        | (0.22-15.1)  |      |      | 0.001      | (0-2.39)     |      |      |
|                                          | 2B              | 49  | 47   | 95.9 | 1.24        | (0.23-7.74)  |      |      | 0.83       | (0.01-63.59) |      |      |
|                                          | 2A              | 113 | 108  | 95.6 | 1.29        | (0.29-5.04)  |      |      | 0.06       | (0-5.45)     |      |      |
|                                          | 3A (Most urban) | 588 | 571  | 97.1 | 2.14        | (0.55-6.26)  |      |      | 0.11       | (0-146.4)    |      |      |
| <b>Distance to autopsy facility (km)</b> | 0-49            | 515 | 500  | 97.1 | 1           | Ref.         | 18.5 | 0.05 | 1          | Ref.         | 10.9 | 0.37 |
|                                          | 50-99           | 89  | 87   | 97.8 | 1.08        | (0.33-5.54)  |      |      | 5.24       | (0.42-7475)  |      |      |
|                                          | 100-149         | 97  | 97   | 100  | 6.04        | (0.8-773.3)  |      |      | 6.96       | (0.11-4124)  |      |      |
|                                          | 150-199         | 39  | 36   | 92.3 | 0.32        | (0.11-1.28)  |      |      | 0.21       | (0-33.43)    |      |      |
|                                          | 200-249         | 22  | 20   | 90.9 | 0.25        | (0.07-1.34)  |      |      | 0.01       | (0-15.33)    |      |      |
|                                          | 250-299         | 18  | 17   | 94.4 | 0.36        | (0.08-3.41)  |      |      | 0.16       | (0-715.1)    |      |      |
|                                          | 300-349         | 38  | 35   | 92.1 | 0.31        | (0.10-1.25)  |      |      | 0.23       | (0-172.1)    |      |      |
|                                          | 350-399         | 12  | 11   | 91.7 | 0.24        | (0.05-2.28)  |      |      | 0.07       | (0-126.7)    |      |      |
|                                          | 400-449         | 22  | 21   | 95.5 | 0.44        | (0.10-4.16)  |      |      | 0.43       | (0-1540)     |      |      |
|                                          | 450-499         | 9   | 9    | 100  | 0.59        | (0.07-77.1)  |      |      | 0.44       | (0-7725)     |      |      |
| > 500                                    | 13              | 11  | 84.6 | 0.14 | (0.04-0.78) |              |      | 2.34 | (0-555802) |              |      |      |
